1 **A Data-driven Individual-based Model of Infectious Disease**  
2 **in Livestock Operation: A Validation Study for**  
3 **Paratuberculosis**

4 Mohammad. A. Al-Mamun<sup>1\*</sup>, Rebecca. L. Smith<sup>2</sup>, Annette. Nigsch<sup>3</sup>, Ynte. H. Schukken<sup>3,4</sup> & Yrjo.  
5 T. Gröhn<sup>5</sup>

6 <sup>1</sup>Department of Epidemiology of Microbial Diseases, Yale School of Public Health, New Haven,  
7 Connecticut, United States of America.

8 <sup>2</sup>Department of Pathobiology, University of Illinois, College of Veterinary Medicine, Urbana,  
9 Illinois, 61802, United States of America.

10 <sup>3</sup>Department of Animal Sciences, Wageningen University, Wageningen, 6700 AH, The  
11 Netherlands.

12 <sup>4</sup>GD Animal Health, Arnsbergstraat 7, 7411 EZ, Wageningen, The Netherlands.

13 <sup>5</sup>Department of Population Medicine and Diagnostic Sciences, Cornell University, College of  
14 Veterinary Medicine, Tower Road, Ithaca, New York, 14853, United States of America.

15

16 \*Email: [mohammad.al-mamun@yale.edu](mailto:mohammad.al-mamun@yale.edu)

17

18

19

20

21

22

23

24 **Abstract**

25 Chronic livestock diseases cause large financial loss and affect the animal health and welfare.  
26 Controlling these diseases mostly requires precise information on both individual animal and  
27 population dynamics to inform farmer's decision. Mathematical models provide opportunities to  
28 test different control and elimination options rather implementing them in real herds, but these  
29 models require valid parameter estimation and validation. Fitting these models to data is a  
30 difficult task due to heterogeneities in livestock processes. In this paper, we develop an  
31 infectious disease modeling framework for a livestock disease (paratuberculosis) that is caused  
32 by *Mycobacterium avium* subsp. *paratuberculosis* (MAP). Infection with MAP leads to reduced  
33 milk production, pregnancy rates, and slaughter value and increased culling rates in cattle and  
34 causes significant economic losses to the dairy industry in the US. These economic effects are  
35 particularly important motivations in the control and elimination of MAP. In this framework, an  
36 individual-based model (IBM) of a dairy herd was built and a MAP infection was integrated on  
37 top of it. Once the model produced realistic dynamics of MAP infection, we implemented an  
38 evaluation method by fitting it to data from three dairy herds from the Northeast region of the  
39 US. The model fitting exercises used least-squares and parameter space searching methods to  
40 obtain the best-fitted values of selected parameters. The best set of parameters were used to  
41 model the effect of interventions. The results show that the presented model can complement  
42 real herd statistics where the intervention strategies suggested a reduction in MAP but no  
43 elimination was observed. Overall, this research not only provides a complete model for MAP  
44 infection dynamics in a cattle herd, but also offers a method for estimating parameter by fitting  
45 IBM models.

46

47

## 48 **Introduction**

49 Chronic livestock diseases like paratuberculosis (PTB) and bovine tuberculosis (bTB) are  
50 commonly reported worldwide (1,2). Bovine TB is caused by the pathogen *Mycobacterium bovis*  
51 (*M. bovis*) while PTB is caused by *Mycobacterium avium* subsp. *paratuberculosis* (MAP). In the  
52 UK, bTB has been spreading over the last two decades, putatively due to the presence of a  
53 wildlife reservoir in badgers(3). In United States (US), 68% of dairy herds have apparently at least  
54 one cow that is infected with MAP (4). Both diseases pose a potential threat not only to animal  
55 health and production, but also to public health. Historically, bTB has been a contributor to  
56 human TB cases worldwide and PTB infections in humans have been associated with an  
57 increased risk of Crohn's disease in humans(5). Recently, it has been reported that these  
58 diseases may induce additional collateral risks for public health due to dispensed antibiotics as  
59 a treatment in some cases can potentially contribute to the spread of antibiotic resistance(6).

60  
61 In the US cattle industry, the cost of PTB was estimated at \$250 million every year (7). Infection  
62 by MAP usually occurs in the first year of life(8) and transmission can occur vertically (9) and/or  
63 horizontally via ingestion of fecal material contaminated by MAP (10). As PTB is a slowly  
64 progressive disease, progression of individual animals through different MAP infection states is  
65 a complex continuous process alternating excreting and non-excreting stages with a late onset  
66 of clinical signs (11,12). It has a large economic impact for producers due to decreased milk  
67 production (13–15), premature culling (16,17), reduced slaughter value (18), low fertility (19,20),  
68 and an increased animal replacement rate (21). However, tests routinely used on individuals have  
69 low sensitivities, especially in the early stages of the disease (22).

70  
71 In last two decades, different mathematical models have been developed on a within-herd scale  
72 to understand MAP transmission dynamics (23,24) and effectiveness of recommended control

73 strategies (25–28). These models were simulated to assess the impact of contact structure on  
74 the MAP transmission (23) , efficacy of test-and-cull policy (24,25,29,30), impact of low  
75 diagnostic test sensitivity in decision making (8,31), stopping some transmission pathways using  
76 hygiene improvement (32), improved calf management (33), impact of super-shedders in  
77 transmission(34,35) , and economic efficacy of recommended programs (29). Most of these  
78 studies suggest that culling a test positive animal is an effective solution to reduce the  
79 prevalence. However, none of the previous models considered the pervasiveness of MAP in the  
80 farm environment and the value of information of individual animal along with real dairy herd  
81 data. Moreover, controlling MAP requires significant management of testing and culling  
82 strategies to reduce the prevalence, which are normally unregulated and reliant on farmers'  
83 decisions(36). The decision of culling an animal is not straightforward and poses a multiscale  
84 problem where an individual animal, farm dynamics, infectious status and disease symptoms,  
85 and management profit are related (37). Substantial costs are also related to the implementation  
86 of control measures and prevention (21,34,38). Though previous compartmental MAP models  
87 have shown many potential interventions programs, most considered population-level decision  
88 making rather than individual-level animal information. Recently, individual-based models (IBMs)  
89 have been proposed to show the value of the information about the infection, daily life events  
90 and management policy for each individual animal within the farm (32,37,39–42)

91

92 Mathematical models of infectious diseases often direct us to understand both infection biology  
93 and efficacy of intervention policies taken in human and veterinary medicine(43). However,  
94 translating modeling results into practice require appropriately real-world assumptions to be built  
95 into the model. We hypothesize that in case of MAP, the use of model results will more realistic  
96 when the model has been built on up-to-date infection biology and epidemiology, parametrized  
97 from adequate real herd data and fitted back to that real-world scenario to test the recommended

98 intervention strategies. In this paper, our aim is to build an IBM framework of MAP infection that  
99 is fitted to and validated by in-depth longitudinal data from three northeastern dairy farms. The  
100 objective of this study was four-fold: first, we extended an existing IBM of a dairy herd to  
101 resemble the population level parameters (i.e. milk yield, herd size) with three real herds to create  
102 three *in silico* herds; second, we fitted the milk-yield measurement of individual animal to those  
103 herds; third, we fitted the model-predicted apparent MAP prevalence to the observed data to  
104 obtain herd-specific important infection parameters; and fourth, we integrated a risk-based  
105 control strategies on those three *in silico* herds to evaluate the efficacy. Finally, we discuss the  
106 value of observational data to feed information to simulation models, thereby making simulations  
107 more reflective and predictive of real-world circumstances.

108

109

## 110 **Materials and Method**

### 111 **The Individual-based model**

112 We used the dairy herd model named a multiscale agent-based simulation of a dairy herd  
113 (MABSdairy), an improved version of dairy herd published in Al-Mamun et al. (32,40). The  
114 MABSdairy is a multiscale stochastic IBM that simulates individual cows in a standard US cattle  
115 herd with a daily time step. In brief, each cow resides in one of three different management  
116 operations: adult/milking (aged >720 days), calf (aged 1-60 days) and heifer rearing housing  
117 (aged 61-719 days). Adult cows must calve to produce milk and the lactation cycle refers to the  
118 period between one calving and the next. The lactation cycle included the processes of a  
119 voluntary waiting period (interval during the postpartum period), insemination, and the dry off  
120 period (a non-lactating period prior to an impending parturition to optimize milk production in the  
121 subsequent lactation). For the fitting purpose, we modified the milk production Wood lactation  
122 curve by adding a herd-specific term and a herd-specific random component(44). The function

123 is defined as

$$Y_t = ad^b e^{ct} + f_i * f_r \quad (1)$$

where  $i = \text{Parity 1 and 2 by farm A, B and C}$

124 where  $Y_t$  is the yield on day  $t$  after calving,  $d$  is days in milk (DIM),  $a$  is a scaling factor for initial  
125 yield,  $b$  is a rate factor for the increase in yield to peak,  $c$  is a rate factor for the decline after  
126 the peak,  $f_i$  farm specific factor and  $f_r$  is a random number. We used base milk yield parameters  
127 from Dematawewa et al. for parities 1 and  $\geq 2$  in the basic model (45).

128

### 129 **MAP infection dynamics**

130 The infection compartments in the milking herd were divided into four categories: susceptible  
131 ( $X_A$ ), latent (H), low shedding ( $Y_1$ ), and high shedding ( $Y_2$ ). In calf rearing housing, there were two  
132 infection categories: susceptible ( $X_C$ ) and infected ( $Y_C$ ). In heifer rearing housing, there were also  
133 two infection categories: susceptible ( $X_H$ ) and infected ( $Y_H$ ). We included six different  
134 transmission routes: adult-to-adult, adult-to-calf (vertical transmission), adult-to-calf (horizontal  
135 transmission), environmental contamination, calf-to-calf, and heifer-to-heifer. The detailed  
136 infection structure is shown in Fig1.

137

138 Fig1. A flow diagram of animal movement among infection categories for the adult, calves, and  
139 heifers within the herd. Each horizontal gray box classifies the animals according to their initial  
140 age group. The green and red boxes define the susceptible and infected states, respectively, for  
141 each animal in the three age categories. The probabilities of exit at each time point from  
142 susceptible to latent, latent to low shedding and low shedding to high shedding animals are  $s_1$ ,  
143  $h_1$ , and  $y_1$ , respectively. Vertical transmission probabilities from latent, low shedding and high

144 shedding animals are  $V_h, V_{y1},$  and  $V_{y2},$  respectively. Horizontal transmission probabilities to calves  
 145 from low shedding and high shedding animals are  $H_{y1}$  and  $H_{y2},$  respectively. The probability an  
 146 animal gets infected by the environment is  $\beta_{environment}.$  Calf-to-calf and heifer-to-heifer  
 147 transmission probabilities are  $C_{inf}$  and  $Y_{inf}$  respectively. Stochastic death/sale probabilities for  
 148 adult, calves, and heifers are  $\mu_a, \mu_c,$  and  $\mu_h,$  respectively.  $\mu$  is the replacement animals coming  
 149 from heifer compartment upon completion of two years.

150

151 In the milking herd group, adult animals could be infected by low and high shedding adults. The  
 152 probability of fecal-oral transmission for adult animals can be given by:

$$Inf_{adult-adult} = \beta_A \left( \frac{(\beta_{direct} + \beta_{environment})}{N} \right) \quad (2)$$

$$\beta_{direct} = \beta_{Y_1} Y_1 + \beta_{Y_2} Y_2$$

$$\beta_{environment} = U(0,1)$$

153 Susceptible adult animals in the milking herd compartment were susceptible to MAP infection  
 154 by contact with low shedding ( $Y_1$ ) and high shedding ( $Y_2$ ) animals with transmission rates of  $\beta_{Y_1}$   
 155 and  $\beta_{Y_2},$  respectively.  $\beta_A$  is the adult-to-adult transmission coefficient,  $\beta_{environment}$  is the MAP  
 156 contamination risk from the environment and  $N$  is the total number of animals in the milking herd,  
 157  $N = X_A + H + Y_1 + Y_2.$  The horizontal infection probability to calves can be determined by

$$Inf_{adult-calf} = \beta_a \left( \frac{\beta_{direct} + \beta_{environment}}{N_c} \right) \quad (3)$$

158  $\beta_a$  is the horizontal transmission coefficient for an adult to newborn calves and  $N_c$  is the total  
 159 number of calves at every day,  $N_c = X_c + Y_c.$  A calf can also become infected vertically (i.e., in  
 160 utero infection) by an adult and which are modelled using the certain proportions(25) .

161 A calf stays in calf rearing housing for the first 60 days after birth. The probability of direct  
162 transmission was calculated as

$$Inf_{calf-calf} = \alpha + \beta_c \left( \frac{Y_c + \beta_{environment}}{N_c} \right) \quad (4)$$

163  $\beta_c$  is the horizontal calf-to-calf transmission coefficient,  $N_c$  is the total number of calves at each  
164 day,  $X_c$  is susceptible calves,  $Y_c$  is infected calves. During the first day after birth, a calf may also  
165 be infected horizontally by infected adults present in the maternity pen or vertically by an infected  
166 dam.

167 Susceptible calves became susceptible heifers and infected calves became infected heifers.  
168 Infected heifers could infect susceptible heifers by the heifer-to-heifer transmission path

$$Inf_{heifer-heifer} = \beta_h \left( \frac{Y_h + \beta_{environment}}{N_{XH}} \right) \quad (5)$$

169  $\beta_h$  is the horizontal heifer-to-heifer transmission coefficient, and the total number of heifers is  
170  $N_{XH} = X_H + Y_H$ . After one year, the infected heifers became latent heifers and eventually entered  
171 the milking herd as latent adults. For simplifying the model, we assumed that heifer remains in  
172 the heifer rearing housing are transiently shedding while they ended up in the adult herd as  
173 latent animals.

174

## 175 **Observed herd data**

176 The longitudinal dataset used here was obtained from a longitudinal study of three commercial  
177 dairy farms in the northeastern US: farm A in New York State, farm B in Pennsylvania, and farm  
178 C in Vermont (46,47). All three farms participated in the Regional Dairy Quality Management  
179 Alliance (RDQMA) project, which was a multistate research program conducted under a  
180 cooperative research agreement between the USDA Agricultural Research Service (ARS) and



181 four Universities: Cornell University, Pennsylvania State University, University of Pennsylvania,  
182 and University of Vermont. The project consisted of longitudinal data collection for endemic  
183 infectious diseases of public and animal health concern in dairy herds. For a more complete  
184 description, including information on farms, samplings, and microbial analyses, see Pradhan et  
185 al.(46) Briefly, the milking herds consisted of approximately 330, 100, and 140 cows on farms A,  
186 B, and C, respectively. Sampling commenced in February, March, and November 2004 on farms  
187 A, B, and C, respectively, and continued for approximately 7 years, until 2010. The project design  
188 included a biannual collection of individual fecal samples and a quarterly collection of individual  
189 serum samples from all milking and non-lactating cows. Additionally, culled cows were tracked  
190 as much as possible from the farm to the slaughterhouse, where four gastrointestinal (GI) tissues  
191 and a fecal sample were collected with the cooperation of USDA Food Safety and Inspection  
192 Service (FSIS) personnel. The harvested tissues included two lymph nodes located at the  
193 ileocecal junction and two pieces of ileum, one taken from 20 cm proximal to the ileocecal valve  
194 and the other taken from very near the ileocecal valve. In addition to the sampling of animals,  
195 the farm environment was sampled in approximately 20 locations on a biannual basis. All fecal  
196 and environmental samples were tested by 4-tube culture for presence of viable MAP organisms,  
197 reported as colony-forming units per tube. All serum samples were tested using the ParaCheck  
198 ELISA (Prionics USA Inc., La Vista, NE) for antibody reactions to MAP antigens. On each of the  
199 farms, demographic data, production data and herd management information was collected.  
200 Precise demographic data included birth date, birth location, calving dates, fertility data, animal  
201 location data (pen status at any point in time), dry-off dates and culling information and cull  
202 dates. These demographic data were collected for each animal present on the farms. All infection  
203 data, strain typing data, herd management, demographic and production data was maintained  
204 in a relational database.

205

206 **Model parameters**

207 The parameterization of the base dairy herd model is described in Al-Mamun et al. (32,48). Initial  
 208 infection parameter values were updated according to Mitchell et al. 2015(43). Table 1 provides  
 209 the base parameters for the initial MAP transmission before fitting the model to the RDQMA  
 210 herds.

211 Table 1. Base parameter values of *Mycobacterium avium* subsp. *paratuberculosis* (MAP)  
 212 infection within a dairy herd.

| Symbols      | Description                                                                 | Initial value | References              |
|--------------|-----------------------------------------------------------------------------|---------------|-------------------------|
| $V_h$        | The proportion of calves from latent animals infected at birth              | 0.15          | (25)                    |
| $V_{y1}$     | The proportion of calves from low-shedding animals infected at birth        | 0.15          | (25)                    |
| $V_{y2}$     | The proportion of calves from high-shedding animals infected at birth       | 0.17          | (25)                    |
| $\beta_A$    | Adult-to-adult transmission coefficient                                     | 0.05          | (32)                    |
| $\beta_a$    | Adult-to-calf transmission coefficient                                      | 0.383         | (32)                    |
| $\beta_c$    | Calf-to-calf transmission coefficient                                       | 0.0025        | (32)                    |
| $\beta_h$    | Heifer-to-heifer transmission coefficient                                   | 0.001         | Calibrated in the model |
| $\beta_{y1}$ | Transmission rate between low shedders ( $Y_1$ ) and susceptible ( $X_A$ )  | 2/year        | Calibrated in the model |
| $\beta_{y2}$ | Transmission rate between high shedders ( $Y_2$ ) and susceptible ( $X_A$ ) | 20/year       | Calibrated in the model |

213

214

## 215 **Model fitting method**

216 The goal of the model-fitting exercise was to estimate key parameters in order to produce results  
217 consistent with the epidemiologic data from three farms. Our fitting exercise was two-fold: first,  
218 we fitted our base dairy herd models with farm-specific parameters (total population and milk  
219 yield), then we fitted the model predicted apparent prevalence results based on antemortem  
220 ELISA and fecal testing and postmortem tissue and fecal testing results for the farm. To assess  
221 the goodness-of-fit we sampled from the defined parameter ranges in multiple rounds and the  
222 model was run for three different scenarios of each of the three farms. The model fitting was  
223 done using a non-linear fitting method named Nelder-Mead Simplex Method (49), which is used  
224 for unconstrained optimization. While fitting the milk yield and apparent prevalence, the best-fit  
225 parameters were extracted.

226 To determine the specific range for each parameter, we used multidimensional parameter space  
227 searching method. The point estimate of each parameter was taken as a mean value and, using  
228 Latin Hypercube Sampling, 100,000 parameter combinations were generated spanning the  
229 specified range  $\pm 75\%$  of the mean values. The searching was done in two stages. In the first  
230 stage, we set a broad range to identify the particular regions of the parameter range and chose  
231 the best 10000 (1%) parameter sets. In the next stage, we ran the simulation with 10% parameter  
232 sets to compare with the best fit curve by minimizing the sumsquare error. The parameter ranges  
233 presented in the results section were calculated from the top 1% simulations.

234

## 235 **Intervention strategies**

236 Once the three *in silico* herds were stable using fitted values, we tested a proposed intervention  
237 strategy. We chose risk-based testing and culling strategies suggested by Al-Mamun et al. (32).

238 In brief, all cows that tested negative throughout testing were marked as low risk or green cows.  
239 The cows that tested positive were divided into two groups: yellow and red. Red animals had at  
240 least 2 positive tests out of the last 4 tests and yellow cows had one positive test. We proposed  
241 two controls: control I, culling red animals straightway (aggressive culling); and control II, culling  
242 only red animal with a delay of 305 DIM (delayed culling). The simulations results were then  
243 compared against the observed pre-fitted data from the three herds. To evaluate the efficacy of  
244 the intervention, we divided our seven years of observation into two parts: the first 4 years were  
245 used for pre-intervention fit, while the last 3 years were used for validation against the model  
246 results, in which the intervention was introduced and run for 3 years. Moreover, we extended the  
247 intervention for more two years to see the long-term efficacy.

248

#### 249 **Simulation background**

250 First, the base dairy herd model was initiated with a certain proportion of adult animals for farms  
251 A (330), B (100) and C (140). Second, after a 2-year burn-in period the model was run for 7 more  
252 years to resemble the observations of the real herds. During the 2 years burn-in period, each  
253 farm was assumed to be self-sufficient in producing their own replacement, so that no animal  
254 purchase from outside was needed. The model was initiated with a pre-determined distribution  
255 of animals with different parities. Every day, the algorithm first determined the group of animals.  
256 If it found adult animals, it checked reproductive status (voluntary waiting period (VWP), waiting  
257 to be inseminated, and pregnant) and milk yield status. Any cow on the 280th day of pregnancy  
258 was assumed to calve. For a newborn calf, the stillbirth probability was checked; if the calf was  
259 not stillborn, it was flagged as a calf. Only female calves were kept in the herd, and male calves  
260 were removed/sold immediately after birth. Once an adult animal calved, it transitioned to VWP  
261 status and continued in the milking herd loop until it was removed due to culling or death.  
262 Mortality was allowed in the calf rearing loop; otherwise, calves were transferred into the heifer

263 loop at the 61st day of age. In the heifer loop, heifers were inseminated at the 400th day of age  
264 in order to become pregnant, so that they would calve at the 680th day of age. When heifers  
265 were ready to calve for the first time, they transitioned to the milking herd in the model. The  
266 model was fitted for the 7 years data for each farm. Third, for testing intervention strategies, each  
267 model was fitted to the first 4 years of data- that is called pre-intervention fit, and then the  
268 intervention was tested in 2 phases. In the first phase, 3 years and then extended more 2 years  
269 to see how the suggested strategies result in long term. The base model was developed as  
270 custom codes in MATLAB and other data analysis were done using R.

271

## 272 **Results**

273 The purpose of the fitting exercises was to obtain a better fit to the estimates of three herds prior  
274 fitting to the apparent prevalence. The model predicted total number of animals (adult, calves,  
275 and heifers) closely resembles the data from the three real farms (shown in table 2).

276

277 Table 2. The comparison of observed and predicted values from three *in silico* farms in terms of  
278 a total number of animals, and average daily milk yield (in kg) for 305 days, presented as Mean  
279 (95% Confidence Interval).

| Herd A    | Total number of animals | Milk yield: parity 1 | Milk yield: parity $\geq 2$ |
|-----------|-------------------------|----------------------|-----------------------------|
| Observed  | 720 (708-754)           | 36.07 (29.61-40.73)  | 39.48 (27.11-49.86)         |
| Predicted | 714 (693-737)           | 36.15 (30.44-40.73)  | 39.49 (27.56- 50.18)        |
| Herd B    |                         |                      |                             |
| Observed  | 194 (102-230)           | 33.38 (24.34-40.35)  | 34.52 (17.42-47.40)         |
| Predicted | 200 (182-219)           | 32.97 (26.51-38.31)  | 34.97 (21.86-48.29)         |
| Herd C    |                         |                      |                             |

|           |               |                      |                     |
|-----------|---------------|----------------------|---------------------|
| Observed  | 262 (116-339) | 27.49 (19.03-34.68)  | 27.49 (19.03-34.68) |
| Predicted | 221 (184-257) | 27.16 ( 20.23-32.98) | 27.90 (17.12-38.06) |

280

281 Fig2 shows the concordance between predicted and observed milk yield data from three herds.

282 It is evident that the models predicted milk yield estimations matched with the observed milk

283 yield from three northeastern herds. The best fit model predictions to the observed milk yield

284 curve for parity 1 and parity  $\geq 2$  are shown in supplementary FigS1 . The best fitting lines also

285 describe that the model was able to capture inherent randomness from the data into the model.

286 The estimation of the critical parameters  $a$ ,  $b$ ,  $c$ , and  $f_i$  of the modified lactation curve are

287 presented in table 3.

288

289 Fig2. The comparison of observed and model predicted milk yield distribution for 1% simulation

290 using best fit parameters for the milk yield. In the box plot, the bottom and top end of the bars

291 are minimum and maximum values respectively, the top of the box is the 75th percentile, the

292 bottom of the box is the 25th percentile, and the horizontal line within the box is median; outliers

293 are presented as a solid black circle and the density of the milk yield is presented by the width

294 of the violin.

295 Table 3. The estimated parameters from the fitting exercise for the modified milk yield function

296 for three farms A, B, and C.

|                        | $a$   | $b$   | $c$     | Herd specific parameter<br>( $f_i$ ) |
|------------------------|-------|-------|---------|--------------------------------------|
| Farm A-Parity 1        | 17.87 | 0.207 | 0.00199 | 3.59                                 |
| Farm A-Parity $\geq 2$ | 25.23 | 0.199 | 0.00329 | 5.19                                 |
| Farm B-Parity 1        | 16.09 | 0.198 | 0.00196 | 6.60                                 |

|                        |       |       |         |      |
|------------------------|-------|-------|---------|------|
| Farm B-Parity $\geq$ 2 | 23.38 | 0.200 | 0.00392 | 8.33 |
| Farm C-Parity 1        | 15.25 | 0.193 | 0.00269 | 6.55 |
| Farm C-Parity $\geq$ 2 | 16.50 | 0.215 | 0.00399 | 9.00 |

297

### 298 **Model fitting exercises**

299 Table 4 represents the observed apparent prevalence and apparent incidence and the tracking  
300 of the animals in the next biannual testing for three farms for seven years, 2004-2010. The  
301 observed prevalence shows zero infected animals in the last half of 2010, for the sake of  
302 persistence scenario we replace that with the previous quarter value. During our simulation, we  
303 normalized the prevalence with the previous half of the year so that it remains consistent for our  
304 simulation. We simulated the three *in silico* farms to fit with the observed apparent prevalence  
305 data from herd A, B and C.

306

307 Fig3 shows the model predicted prevalence with a 95% confidence interval while fitting against  
308 the observed prevalence. It should be noted that our model confidence interval overpredicts the  
309 prevalence of herd B, but for other two herds it forecasts the better fitting. Through this model  
310 fitting exercise, our aim was to estimate the critical infection parameters for each herd, so that  
311 we can suggest herd specific intervention strategies.

312

313 Table 4. The calculation of apparent prevalence and apparent incidence and the tracking of the animals in the next testing in bi-  
 314 annually phase for three farms (2004-2010).

| Year                             | 2004 |      | 2005 |      | 2006 |      | 2007 |      | 2008 |      | 2009 |      | 2010 |     |
|----------------------------------|------|------|------|------|------|------|------|------|------|------|------|------|------|-----|
| Test phase                       | 1    | 2    | 3    | 4    | 5    | 6    | 7    | 8    | 9    | 10   | 11   | 12   | 13   | 14  |
| <b>Herd A</b>                    |      |      |      |      |      |      |      |      |      |      |      |      |      |     |
| Total positive cows <sup>a</sup> | 14   | 25   | 34   | 28   | 34   | 32   | 21   | 23   | 24   | 17   | 14   | 9    | 7    | 0   |
| Animals tested                   | 315  | 330  | 364  | 349  | 354  | 364  | 338  | 332  | 337  | 347  | 341  | 347  | 296  | 239 |
| Apparent prevalence              | 4.4  | 7.6  | 9.3  | 8.0  | 9.6  | 8.8  | 6.2  | 6.9  | 7.1  | 4.9  | 4.1  | 2.6  | 2.4  | 0.0 |
| New cases <sup>b</sup>           | 14   | 16   | 18   | 12   | 13   | 13   | 7    | 10   | 11   | 6    | 5    | 2    | 0    | 0   |
| Cow-years at risk <sup>c</sup>   |      | 239  |      | 293  |      | 284  |      | 272  |      | 276  |      | 280  |      | 198 |
| Apparent incidence <sup>d</sup>  |      | 0.13 |      | 0.10 |      | 0.09 |      | 0.06 |      | 0.06 |      | 0.02 |      | 0   |
| <b>Herd B</b>                    |      |      |      |      |      |      |      |      |      |      |      |      |      |     |
| Total positive cows              | 9    | 8    | 6    | 3    | 6    | 5    | 4    | 3    | 3    | 2    | 5    | 5    | 1    | 0   |
| Animals tested                   | 106  | 122  | 128  | 128  | 113  | 113  | 115  | 114  | 111  | 109  | 113  | 109  | 82   | 1   |
| Apparent prevalence              | 8.5  | 6.6  | 4.7  | 2.3  | 5.3  | 4.4  | 3.5  | 2.6  | 2.7  | 1.8  | 4.4  | 4.6  | 1.2  | 0.0 |
| New cases                        | 9    | 1    | 2    | 0    | 5    | 4    | 1    | 0    | 1    | 1    | 4    | 1    | 0    | 0   |
| Cow-years at risk                |      | 72   |      | 99   |      | 95   |      | 94   |      | 93   |      | 83   |      | 37  |
| Apparent incidence               |      | 0.14 |      | 0.02 |      | 0.10 |      | 0.01 |      | 0.02 |      | 0.06 |      | 0   |



| <b>Herd C</b>       |    |      |      |      |      |      |      |      |      |      |     |      |     |     |
|---------------------|----|------|------|------|------|------|------|------|------|------|-----|------|-----|-----|
| Total positive cows | 0  | 17   | 26   | 23   | 19   | 22   | 18   | 20   | 18   | 15   | 13  | 8    | 7   | 0   |
| Animals tested      | 0  | 121  | 145  | 149  | 178  | 161  | 145  | 155  | 157  | 145  | 142 | 117  | 102 | 0   |
| Apparent prevalence | NA | 14.0 | 17.9 | 15.4 | 10.7 | 13.7 | 12.4 | 12.9 | 11.5 | 10.3 | 9.2 | 6.8  | 6.9 | NA  |
| New cases           | 0  | 17   | 9    | 7    | 5    | 9    | 5    | 4    | 4    | 5    | 2   | 2    | 1   | 0   |
| Cow-years at risk   |    | 13   |      | 114  |      | 123  |      | 110  |      | 117  |     | 108  |     | 33  |
| Apparent incidence  |    | 1.27 |      | 0.14 |      | 0.11 |      | 0.08 |      | 0.08 |     | 0.04 |     | 0.0 |
|                     |    |      |      |      |      |      |      |      |      |      |     |      |     | 3   |

315 <sup>a</sup>Test positive cows by considering enzyme-linked immunosorbent assay (ELISA) testing, fecal testing and tissue testing.

316 <sup>b</sup>Number of cows tested positive for the first time

317 <sup>c</sup>Observation time (in years) from entry in the study (at the first testing) until each cow tested positive or left the study (by culling, i.e.

318 the infection status of cow is right censored)

319 <sup>d</sup>New cases per year / cow-years at risk

320

321 Fig3. The fitting results of three *in silico* herds A (top), B (middle), and C (bottom) compared to  
322 the observed apparent prevalence for 7 years by biannual sampling. The shaded region shows  
323 the 95% confidence interval of the best 1% simulation runs.

324

### 325 **Estimated parameters**

326 Table 5 provides the best fit estimates of herd-specific infection parameters for three  
327 northeastern dairy herds. Among the three herds, the model suggested that dam-to daughter  
328 transmission routes were the major transmission routes with the coefficient ( $\beta_a$ ) values of 0.4046,  
329 0.1781 and 0.825 for farm A, B and C respectively. Environmental contamination was the second  
330 major transmission routes while adult-to-adult transmission route was ranked third. Interestingly,  
331 we found that the importance of adult-to-calf transmission was highest in herd C, in which the  
332 initial number of latent animals were highest in numbers among the three herds. Based on the  
333 best 1% parameter sets, herd C again had the highest number of latent animals present (shown  
334 in supplementary table S1).

335 Table 5. The values of fitted parameters for three farms A, B and C.

| <b>Parameters</b>                                                | <b>Herd A</b> | <b>Herd B</b> | <b>Herd C</b> |
|------------------------------------------------------------------|---------------|---------------|---------------|
| Adult to adult transmission coefficient ( $\beta_A$ )            | 0.0069        | 0.0023        | 0.0005        |
| Adult to calf transmission coefficient ( $\beta_a$ )             | 0.4046        | 0.1781        | 0.825         |
| Environmental transmission coefficient ( $\beta_{environment}$ ) | 0.0869        | 0.0711        | 0.0162        |

|                                                         |                        |                        |                        |
|---------------------------------------------------------|------------------------|------------------------|------------------------|
| Calf to calf transmission coefficient ( $\beta_c$ )     | $5.3 \times 10^{-06}$  | $3.61 \times 10^{-06}$ | $5.2 \times 10^{-06}$  |
| Heifer to heifer transmission coefficient ( $\beta_h$ ) | $4.36 \times 10^{-06}$ | $1.18 \times 10^{-06}$ | $1.98 \times 10^{-06}$ |
| Initial Latent animals ( $H_i$ )                        | 18                     | 12                     | 81                     |
| Initial low shedding animals ( $Y_{1_i}$ )              | 15                     | 2                      | 12                     |
| Initial high shedding animals ( $Y_{2_i}$ )             | 22                     | 8                      | 9                      |

336 It is also noticeable that herd A has the highest adult-to-adult transmission probability among  
 337 the three farms. Also, the initial starting distribution of the infected animals was very important  
 338 for the fitting. It is seen that herd C start with the highest proportion of latent (73%) and low  
 339 shedding (31%) animals among the three farms. The best-fitted parameters set is shown in the  
 340 supplementary table (shown in supplementary table S1).

341

### 342 **Intervention strategies**

343 Once the three *in silico* herds were obtained from the fitting exercises, our next aim was to test  
 344 the risk-based test and culling policy for each farm. The risk-based intervention was  
 345 implemented after 4 years of the initially fitted model to see the efficacy of the intervention  
 346 strategy. Fig4 presents the summary of the pre-intervention, post-intervention and extended  
 347 intervention results to the three fitted dairy herds. The results clearly show that the suggested  
 348 intervention policy reduces the overall apparent prevalence for three herds, but it is noticeable  
 349 that for high endemic herds the risk-based culling was comparatively less effective than the low  
 350 endemic herds. To investigate further, we extended our intervention 2 years beyond the

351 observations, but we did not see any elimination of MAP infection for the risk-based culling policy  
352 with control II. Culling red animals immediately (control I) was the best policy for all herds to  
353 decrease prevalence. Furthermore, we also calculated the number of years taken by the model  
354 to reduce the prevalence by 25% and 5% while two control programs were implemented after  
355 the pre-intervention period for three farms (shown in FigS2).

356

357 Fig4. The apparent prevalence during the pre- and post-intervention period during the simulation  
358 of three *in silico* herds with two control strategies. Control I: culling red animals immediately and  
359 control II: culling only red animal with a delay of 305 days in milk. The two control measures are  
360 simulated in separating runs of the three *in silico* herds.

361

## 362 **Discussion and conclusion**

363 Currently, only imperfect intervention strategies are available for PTB in the US. Therefore, there  
364 is a need to develop more effective control strategies to facilitate elimination of this disease from  
365 dairy herds. To enhance this effort, the mathematical modeling can play an important role, but  
366 the models can only provide realistic results when built from real herd data, to estimate the herd  
367 and infection-specific parameters and to test different intervention strategies prior to  
368 implementation in real herds. This paper presents an IBM modeling framework of MAP where  
369 simulation prediction was fitted and validated using datasets from a longitudinal study  
370 conducted in three northeastern dairy herds. The fitting exercise shows that the IBM is capable  
371 to reproduce the observed milk yield of each of the three herds separately and estimate key  
372 herd-related parameters. Next, the model results show the best fit to the observed apparent  
373 prevalence and estimate critical transmission parameters for three herds. Ultimately, the best  
374 fitted *in silico* herd models were simulated using risk-based test and culling intervention

375 strategies, showing that these strategies may be more beneficial for low prevalence herds than  
376 for moderately endemic herds.

377

378 The epidemiology of MAP is difficult to study due to the slow progressing nature of MAP,  
379 insufficient testing methods, intermittent shedding of MAP and lack of clinical signs. Many  
380 infected animals are only detected years after initial infection or are actually never detected.  
381 However, precise information on the infection status of animals is valuable for implementing  
382 control strategies. Furthermore, specific information about the animal's daily life events in the  
383 herd (such as age, milk yield, parity status, clinical signs and adult, calf and heifer rearing  
384 management policies) may assist in designing real-world control strategies. To this purpose, our  
385 IBM approach introduced a closed dairy herd model validated with longitudinal datasets  
386 (43,46,50). The basic herd fitting results suggest that we were able to create three *in silico* farms  
387 where the animal distribution was similar to the real herds (shown in table 1). This fitting exercise  
388 suggests that our base dairy herd model is capable of producing stable closed *in silico* dairy  
389 herds, with similar milk yield based on herd-specific milk yield parameters. This kind of features  
390 is very important to evaluate the economic efficacy of the implemented interventions (51).  
391 Moreover, often milk yield gets ignored from the MAP infection model, but accumulatively lower  
392 milk yield influences the culling of animals which is not normally marked that the animal was  
393 culled due to Paratuberculosis symptoms. Similar picture was seen in our data analysis of  
394 RDQMA herds where we found there were only 0.01% times where the animal was culled due  
395 to Paratuberculosis. Our previous study shows that low- and high-path animals produced more  
396 milk before their first positive test than always-negative animals, especially high-path animals.  
397 Although mean production decreased after a first positive test, low-path animals were shown to  
398 recover some productivity(50,52). To account the overall impact of milk yield on culling, we used

399 threshold values of milk yield for parity 1 and 2 for each farm by calculating median milk yield  
400 values for each parity from observed data.

401

402 Next, we fitted three *in silico* herds to the apparent prevalence of the RDQMA herds. The 95%  
403 prediction interval shows that our model captured the trends of the apparent prevalence for three  
404 farms (shown in Fig3). Here we used antemortem ELISA and fecal testing and postmortem tissue  
405 and fecal testing results to determine the test positive animals in our model. In reality,  
406 determining the prevalence is a complex process and such fine-grained detail is rarely available.  
407 For antemortem fecal culture test the sensitivity is determined 23-29% and 70-74% for infected  
408 cattle and infectious cattle respectively while at the slaughter house culture of tissue and fecal  
409 results 50% and 100% sensitivity and specificity, respectively. On the contrary for ELISA test  
410 our RDQMA suggests 20% and 96% sensitivity and specificity, respectively and these numbers  
411 are aligned with the previous reports by Nielsen and Toft(53) . To avoid this complexity, we have  
412 chosen a range of 25-35% sensitivity for infected animals and 96% specificity. Recently, an  
413 adaptive test scheme was suggested from a simulation model simulated on the standard Danish  
414 dairy herd (8).In another study, test-records from 18,972 Danish dairy cows with MAP specific  
415 IgG antibodies on their final test-record were used to estimate age-specific sensitivities (54). It  
416 is a critical decision for a farm owner to choose one of the antemortem test as the outcome of  
417 the fecal culture results can be delayed while ELISA test is also imperfect. Moreover, it also  
418 depends of the testing practices and recommendations varied in different geographical regions  
419 while strategies like adaptive test scheme, age-specific sensitivities and frequent testing can  
420 provide us optimal solution. But, care should be taken whether using frequent testing strategies  
421 may pick the false positive animal.

422

423 In order to control an infectious disease, it is important to determine which transmission routes  
424 are playing a major role in persistence of the pathogen on the farm. Traditionally, the dam-to-  
425 daughter route is considered the primary route for transmitting MAP, but it can vary due to herd  
426 management policy. It is very difficult to estimate this parameter directly from the epidemiological  
427 data due to imperfect testing, misidentification of super-shedders and management policies. The  
428 parameter value range estimated here suggests that dam-to-daughter transmission was indeed  
429 the primary transmission route with environmental transmission played as a secondary role. The  
430 role of environmental contamination is also difficult to measure from the epidemiological data,  
431 as MAP is pervasive within a dairy herd. A recent effort was made to quantify the environmental  
432 contamination through fecal-culture and mathematical studies (55). In our longitudinal data, the  
433 environmental samples were collected quarterly from several locations from farms. The cultures  
434 results suggest that manure storage areas and shared alleyways were most likely to be positive  
435 for three herds (56), but no relationship was found between non-pen environmental sample  
436 status and the distance between shedding animals and the sample's location, and neighboring  
437 pens did not significantly affect the results of the pen-level analysis. In our model, we modeled  
438  $\beta_{environment}$  in a crude way using a probability distribution for the sake of simplicity. To precisely  
439 quantify the role of different environments, further investigation into infection sources may be  
440 needed, potentially by examining the pathogens' genomic sequencing data.

441

442 To date, the best-suggested control strategies against MAP is test and cull strategies.  
443 Previously, several compartmental models were used to test different testing and culling  
444 strategies, providing the average impact of the testing and culling strategies. However, targeted  
445 test and cull requires combining information from each individual animal with farm management  
446 and hygiene policy. Recently, an IBM model suggested that a new ethanol vortex ELISA  
447 (EVELISA) could be cost-effective and that quarterly test-and-cull control was able to

448 significantly reduce the prevalence (41). Another model, SimHerd, developed by Kudahl et al.  
449 required fecal culture confirmation of ELISA-positive cows before culling, and relied on repeated  
450 testing to find the most infectious animal. Neither of these two models were validated and fitted  
451 to real dairy herd data (57). A recent mechanistic bio-economic model showed that MAP can be  
452 eradicated, although the control strategy necessary was economically unattractive (27,31). That  
453 model was parameterized specifically for Danish conditions, which are different from the US. In  
454 a previous effort, we suggested risk-based culling strategies with four different options:  
455 aggressive culling, culling open red cows after 305 DIM, culling dam and offspring and culling  
456 dam but not the offspring and we tested these intervention strategies along with different hygiene  
457 conditions on hypothetically endemic herds. For this study, we implemented two risk-based  
458 control strategies: aggressive culling and culling open red cows after 305 DIM on three pre-fitted  
459 herds. We found that aggressive culling resulted in the elimination of 24% and 47% of iterations  
460 after three years and extended intervention, respectively, for a very low endemic herd (farm B).  
461 We also found a probability of elimination 0.11 and 0.24 using culling of open red cows after 305  
462 DIM in three years and extended intervention, respectively. However, it is expected to predict  
463 elimination in very low endemic herds and previously it was seen in a few studies  
464 (26,27,42,43,58). On the contrary, we found elimination in only 6% times after 5 years extended  
465 intervention using aggressive culling in case farm A, which has considerably higher prevalence,  
466 and we did not predict any elimination while culling open red cows after 305 DIM for farms C  
467 and A in long run. However, in terms of moderate and higher prevalence most of the cases, the  
468 farmers want to reduce the prevalence and it is important to simulate how long it takes to reduce  
469 the prevalence at a certain level. From FigS2, it can be said that low endemic herd is more likely  
470 to reach 5% of initial prevalence by less than 2 years while high endemic herd needs extended  
471 time to reach to that point, but it may take more than 10 years in some cases. This suggests that  
472 culling high shedding animals may not provide elimination in high endemic herds, although it can



473 lower the prevalence. The study by Kirkby et al. serial testing along with hygiene play a critical  
474 role in the elimination process in Danish dairy herds, but these may not be economically  
475 justifiable (58). Caution should be taken in transferring conclusions from Denmark to the US, as  
476 both systems are different in many factors. Control activities are not uniformly coordinated  
477 nationally and internationally due to the variation in different farm management policies and  
478 government programs.

479 MAP is endemic in the bovine population in the US, which makes elimination unlikely at this time.  
480 When elimination is not possible, we have to rely on implementing the best herd-specific control  
481 strategies. Previous compartmental models have shown variable results for investigating  
482 infection dynamics(23,25,27) , test-and-culling strategies(25,59) , vaccination(24,60,61) , and  
483 intermittent MAP shedding(30,43). None of these combined the individual animal's information  
484 with herd management policy while fitting the model to real herd data, however. In this regard,  
485 the IBM paradigm should provide more effective approaches to test the intervention by  
486 considering information about the individual animal and overall population. Before using the  
487 insights of any IBM, very careful consideration should be given how the model was  
488 parameterized and validated. In this current study, we developed a fitting framework where an  
489 existing IBM model was fit against a longitudinal field study on three northeastern dairy herds to  
490 create the real herd's condition in the *in silico* platform. The fitting exercises provide estimates  
491 of the critical parameters related to an infection whose transmission is herd-specific. Like all  
492 models, our model is limited by its assumptions. First, the current model fitting exercise only  
493 included combined testing efficacy, whereas in reality the observed herds used three different  
494 testing strategies (fecal culture, ELISA, and tissue culture). Second, the current model modeled  
495 the role of environmental contamination crudely, but the model is adaptive in nature, allowing for  
496 a more rigorous assessment of environmental contamination once data become available. Third,

497 our current model did not include any economic justification of the suggested control strategies,  
498 but the same base model has previously been used to show the economic justification of culling  
499 in case of the MAP in a separate study (51).

500 This modeling and fitting exercise presented in this paper open multiple doors of further  
501 investigations in future. One extension of model can include the impact of MAP infection on milk  
502 yield while including the economics of milk production for these three farms. Previously, it shown  
503 that the mean milk production decreases after a first positive test, non-progressing animals were  
504 shown to recover milk productivity while progressing animals continue to exhibit a decrease in  
505 milk production, especially after their first high-positive fecal culture (52). This indicates there  
506 needs more investigation how to relate milk production loss as a function of MAP infection  
507 progression and testing results. Another extension of the model may include the clinical and  
508 molecular data of the infected animals. But adding molecular data will require more investigation  
509 how to find who infects whom parameters from the phylogenetic analysis (62,63). The current  
510 model is adaptive in nature to add strain specific data for each individual animal.

511 In conclusion, an important aspect of model building is to perform validation of the models to  
512 the real-life data. In this study, we developed an IBM framework for validating a dairy herd model  
513 and infection dynamics of the MAP to a longitudinal dataset. The assessment of model results  
514 leads us to the conclusion that the evaluation of model results is still a combination of intuitive  
515 model results, validation of the model with the quality data, assumptions that integrated into the  
516 modeling process and estimation of key critical parameters along with true biologics. This  
517 framework can be used in any infectious disease scenario to quantify the importance of key  
518 transmission routes, mapping individual-level data to population-level phenomena and decision  
519 making based on implemented intervention policies while considering between host  
520 transmission mechanisms within a closed population. In summary, the quality of the conclusions

521 drawn from model studies is closely linked to the quality of the data used for estimation of the  
522 parameters and model validation. Models that have been validated with real-world data are more  
523 likely to produce useful and valid results.

## 524 **Acknowledgments**

525 The authors gratefully acknowledge funding provided by the National Institute of Food and  
526 Agriculture of the United States Department of Agriculture through NIFA Award No. 2014-67015-  
527 2240.

## 528 **Author Contributions**

529 Conceived and designed the experiments: MAM, Performed the experiments: MAM, Analyzed  
530 the data: MAM, RLS, and AN, Wrote the paper: MAM, Editing and reviewing: RLS, AN, and  
531 YTG. and YHS.

532

## 533 **References**

- 534 1. BROUGHAN JM, JUDGE J, ELY E, DELAHAY RJ, WILSON G, CLIFTON-HADLEY RS, et  
535 al. A review of risk factors for bovine tuberculosis infection in cattle in the UK and  
536 Ireland. *Epidemiol Infect* [Internet]. 2016 Oct 25 [cited 2018 Jun 14];144(14):2899–926.  
537 Available from: [http://www.journals.cambridge.org/abstract\\_S095026881600131X](http://www.journals.cambridge.org/abstract_S095026881600131X)
- 538 2. Rathnaiah G, Zinniel DK, Bannantine JP, Stabel JR, Gröhn YT, Collins MT, et al.  
539 Pathogenesis, Molecular Genetics, and Genomics of *Mycobacterium avium* subsp.  
540 paratuberculosis, the Etiologic Agent of Johne’s Disease. *Front Vet Sci* [Internet]. 2017  
541 Nov 6 [cited 2018 Jun 14];4:187. Available from:

- 542 <http://www.ncbi.nlm.nih.gov/pubmed/29164142>
- 543 3. Brooks-Pollock E, Roberts GO, Keeling MJ. A dynamic model of bovine tuberculosis  
544 spread and control in Great Britain. *Nature* [Internet]. 2014;511(7508):228–31. Available  
545 from: <http://www.nature.com/doifinder/10.1038/nature13529>
- 546 4. NAHMS. National Animal Health Monitoring System (2007) Dairy 2007-Johne's Disease  
547 on U.S. Dairies, 1991–2007, National Animal Health Monitoring Systems. Fort Collins,  
548 CO; 2007.
- 549 5. Behr M, Collin D. *Paratuberculosis: Organism, Disease, Control*. CABI. 2010.
- 550 6. Woolhouse M, Ward M, van Bunnik B, Farrar J. Antimicrobial resistance in humans,  
551 livestock and the wider environment. *Philos Trans R Soc Lond B Biol Sci* [Internet]. 2015  
552 Jun 5 [cited 2018 Jun 14];370(1670):20140083. Available from:  
553 <http://www.ncbi.nlm.nih.gov/pubmed/25918441>
- 554 7. Ott SL, Wells SJ, Wagner BA. Herd-level economic losses associated with Johne's  
555 disease on US dairy operations. *Prev Vet Med* [Internet]. 1999 Jun 11 [cited 2018 Jun  
556 14];40(3–4):179–92. Available from: <http://www.ncbi.nlm.nih.gov/pubmed/10423773>
- 557 8. Kirkeby C, Græsbøll K, Nielsen SS, Christiansen LE, Toft N, Halasa T, et al. Adaptive  
558 Test Schemes for Control of Paratuberculosis in Dairy Cows. Sreevatsan S, editor. *PLoS*  
559 *One* [Internet]. 2016 Dec 1 [cited 2017 Jan 31];11(12):e0167219. Available from:  
560 <http://dx.plos.org/10.1371/journal.pone.0167219>
- 561 9. Whittington RJ, Windsor PA. In utero infection of cattle with *Mycobacterium avium*  
562 subsp. *paratuberculosis*: A critical review and meta-analysis. *Vet J* [Internet]. 2009 Jan 1  
563 [cited 2018 Jun 14];179(1):60–9. Available from:  
564 <https://www.sciencedirect.com/science/article/pii/S1090023307003061?via%3Dihub>
- 565 10. van Roermund HJW, Bakker D, Willemsen PTJ, de Jong MCM. Horizontal transmission  
566 of *Mycobacterium avium* subsp. *paratuberculosis* in cattle in an experimental setting:

- 567 Calves can transmit the infection to other calves. *Vet Microbiol.* 2007;122(3–4):270–9.
- 568 11. Mitchell RM, Schukken Y, Koets A, Weber M, Bakker D, Stabel J, et al. Differences in  
569 intermittent and continuous fecal shedding patterns between natural and experimental  
570 *Mycobacterium avium* subspecies paratuberculosis infections in cattle. *Vet Res*  
571 [Internet]. 2015;46(1):66. Available from:  
572 <http://veterinaryresearch.biomedcentral.com/articles/10.1186/s13567-015-0188-x>
- 573 12. Nielsen SS. Use of diagnostics for risk-based control of paratuberculosis in dairy herds.  
574 *Pr* [Internet]. 2009;31:150–4. Available from:  
575 <http://inpractice.bvapublications.com/cgi/content/abstract/31/4/150>
- 576 13. Aly SS, Anderson RJ, Adaska JM, Jiang J, Gardner IA. Association between  
577 *Mycobacterium avium* subspecies paratuberculosis infection and milk production in two  
578 California dairies. *J Dairy Sci* [Internet]. 2010 Mar [cited 2018 Jun 14];93(3):1030–40.  
579 Available from: <http://www.ncbi.nlm.nih.gov/pubmed/20172223>
- 580 14. Nielsen SS, Krogh MA, Enevoldsen C. Time to the occurrence of a decline in milk  
581 production in cows with various paratuberculosis antibody profiles. *J Dairy Sci* [Internet].  
582 2009 Jan 1 [cited 2018 Jun 14];92(1):149–55. Available from:  
583 <http://www.ncbi.nlm.nih.gov/pubmed/19109273>
- 584 15. Sorge US, Kelton DF, Lissemore KD, Sears W, Fetrow J. Evaluation of the Dairy Comp  
585 305 Module “Cow Value” in Two Ontario Dairy Herds. *J Dairy Sci* [Internet].  
586 2007;90(12):5784–97. Available from:  
587 [http://www.sciencedirect.com/science/article/pii/S0022030207720556%5Cnhttp://pdn.sciencedirect.com/science?\\_ob=MiamilimageURL&\\_cid=279785&\\_user=789722&\\_pii=S0022030207720556&\\_check=y&\\_origin=article&\\_zone=toolbar&\\_coverDate=31-Dec-2007&view=c&originContent](http://www.sciencedirect.com/science/article/pii/S0022030207720556%5Cnhttp://pdn.sciencedirect.com/science?_ob=MiamilimageURL&_cid=279785&_user=789722&_pii=S0022030207720556&_check=y&_origin=article&_zone=toolbar&_coverDate=31-Dec-2007&view=c&originContent)
- 590 2007&view=c&originContent
- 591 16. Lombard JE, Garry FB, McCluskey BJ, Wagner BA. Risk of removal and effects on milk

- 592 production associated with paratuberculosis status in dairy cows. *J Am Vet Med Assoc*  
593 [Internet]. 2005 Dec 15 [cited 2018 Jun 14];227(12):1975–81. Available from:  
594 <http://www.ncbi.nlm.nih.gov/pubmed/16379637>
- 595 17. Tiwari A, VanLeeuwen JA, Dohoo IR, Stryhn H, Keefe GP, Haddad JP. Effects of  
596 seropositivity for bovine leukemia virus, bovine viral diarrhoea virus, *Mycobacterium*  
597 *avium* subspecies paratuberculosis, and *Neospora caninum* on culling in dairy cattle in  
598 four Canadian provinces. *Vet Microbiol* [Internet]. 2005 Aug 30 [cited 2018 Jun  
599 14];109(3–4):147–58. Available from:  
600 <https://www.sciencedirect.com/science/article/pii/S0378113505001872?via%3Dihub>
- 601 18. Kudahl AB, Nielsen SS. Effect of paratuberculosis on slaughter weight and slaughter  
602 value of dairy cows. *J Dairy Sci*. 2009;92(9):4340–6.
- 603 19. Marcé C, Beaudéau F, Bareille N, Seegers H, Fourichon C. Higher non-return rate  
604 associated with *Mycobacterium avium* subspecies paratuberculosis infection at early  
605 stage in Holstein dairy cows. *Theriogenology* [Internet]. 2009 Mar 15 [cited 2018 Jun  
606 14];71(5):807–16. Available from: <http://www.ncbi.nlm.nih.gov/pubmed/19117602>
- 607 20. Smith RL, Strawderman RL, Schukken YH, Wells SJ, Pradhan a K, Espejo L a, et al.  
608 Effect of Johne’s disease status on reproduction and culling in dairy cattle. *J Dairy Sci*  
609 [Internet]. 2010;93(8):3513–24. Available from: <http://dx.doi.org/10.3168/jds.2009-2742>
- 610 21. Garcia, A. B., Shalloo L. Invited review: The economic impact and control of  
611 paratuberculosis in cattle. *J Dairy Sci* [Internet]. 2015;98(8):5019–39. Available from:  
612 <http://www.ncbi.nlm.nih.gov/pubmed/26074241>
- 613 22. Kirkeby C, Græsbøll K, Halasa T, Toft N, Nielsen SS. Mean effective sensitivity for  
614 *Mycobacterium avium* subsp. paratuberculosis infection in cattle herds. *BMC Vet Res*  
615 [Internet]. 2015;11:190. Available from:  
616 <http://www.pubmedcentral.nih.gov/articlerender.fcgi?artid=4529712&tool=pmcentrez&re>

- 617 ndertype=abstract
- 618 23. Mitchell RM, Whitlock RH, Stehman SM, Benedictus A, Chapagain PP, Grohn YT, et al.  
619 Simulation modeling to evaluate the persistence of *Mycobacterium avium* subsp.  
620 paratuberculosis (MAP) on commercial dairy farms in the United States. *Prev Vet Med*.  
621 2008;83(3–4):360–80.
- 622 24. Lu Z, Schukken YH, Smith RL, Grohn YT. Stochastic simulations of a multi-group  
623 compartmental model for Johne’s disease on US dairy herds with test-based culling  
624 intervention. *J Theor Biol* [Internet]. 2010;264(4):1190–201. Available from:  
625 <http://dx.doi.org/10.1016/j.jtbi.2010.03.034>
- 626 25. Lu Z, Mitchell RM, Smith RL, Van Kessel JS, Chapagain PP, Schukken YH, et al. The  
627 importance of culling in Johne’s disease control. *J Theor Biol*. 2008;254(1):135–46.
- 628 26. Kudahl AB, Nielsen SS, Østergaard S. Economy, efficacy, and feasibility of a risk-based  
629 control program against paratuberculosis. *J Dairy Sci* [Internet]. 2008;91(12):4599–609.  
630 Available from: <http://www.sciencedirect.com/science/article/pii/S0022030208709263>
- 631 27. Kudahl AB, Østergaard S, Sørensen JT, Nielsen SS. A stochastic model simulating  
632 paratuberculosis in a dairy herd. *Prev Vet Med*. 2007;78(2):97–117.
- 633 28. Kudahl a B, Nielsen SS, Ostergaard S. Strategies for time of culling in control of  
634 paratuberculosis in dairy herds. *J Dairy Sci* [Internet]. 2011;94(8):3824–34. Available  
635 from: <http://dx.doi.org/10.3168/jds.2010-3933>
- 636 29. Smith RL, Al-Mamun MA, Gröhn YT. Economic consequences of paratuberculosis  
637 control in dairy cattle: A stochastic modeling study. *Prev Vet Med* [Internet].  
638 2017;138:17–27. Available from: <http://dx.doi.org/10.1016/j.prevetmed.2017.01.007>
- 639 30. Smith RL, Schukken YH, Gröhn YT. A new compartmental model of *Mycobacterium*  
640 *avium* subsp. paratuberculosis infection dynamics in cattle. *Prev Vet Med* [Internet].  
641 2015;122(3):298–305. Available from: <http://dx.doi.org/10.1016/j.prevetmed.2015.10.008>

- 642 31. Kirkeby C, Græsbøll K, Nielsen SS, Christiansen LE, Toft N, Rattenborg E, et al.  
643 Simulating the Epidemiological and Economic Impact of Paratuberculosis Control  
644 Actions in Dairy Cattle. *Front Vet Sci* [Internet]. 2016 Oct 10 [cited 2017 Jan 31];3:90.  
645 Available from: <http://journal.frontiersin.org/article/10.3389/fvets.2016.00090/full>
- 646 32. Al-Mamun MA, Smith RL, Schukken YH, Gröhn YT. Use of an Individual-based Model to  
647 Control Transmission Pathways of *Mycobacterium avium* Subsp. paratuberculosis  
648 Infection in Cattle Herds. *Sci Rep* [Internet]. 2017 Dec 19 [cited 2018 Jun 14];7(1):11845.  
649 Available from: <http://www.nature.com/articles/s41598-017-12078-z>
- 650 33. Marcé C, Ezanno P, Weber MF, Seegers H, Pfeiffer DU, Fourichon C. Invited review:  
651 modeling within-herd transmission of *Mycobacterium avium* subspecies  
652 paratuberculosis in dairy cattle: a review. *J Dairy Sci* [Internet]. 2010;93(10):4455–70.  
653 Available from: <http://www.ncbi.nlm.nih.gov/pubmed/20854979>
- 654 34. Magombedze G, Ngonghala CN, Lanzas C. Evaluation of the “Iceberg Phenomenon” in  
655 Johne’s Disease through Mathematical Modelling. Rao C V., editor. *PLoS One* [Internet].  
656 2013 Oct 22 [cited 2018 Jun 18];8(10):e76636. Available from:  
657 <http://dx.plos.org/10.1371/journal.pone.0076636>
- 658 35. Liu L, Oza S, Hogan D, Perin J, Rudan I, Lawn JE, et al. Global, regional, and national  
659 causes of child mortality in 2000–13, with projections to inform post-2015 priorities: an  
660 updated systematic analysis. *Lancet* [Internet]. 2015 Jan 31 [cited 2018 Jun  
661 18];385(9966):430–40. Available from: <http://www.ncbi.nlm.nih.gov/pubmed/25280870>
- 662 36. Carslake D, Grant W, Green LE, Cave J, Greaves J, Keeling M, et al. Endemic cattle  
663 diseases: comparative epidemiology and governance. *Philos Trans R Soc Lond B Biol  
664 Sci* [Internet]. 2011 Jul 12 [cited 2018 Jun 18];366(1573):1975–86. Available from:  
665 <http://www.ncbi.nlm.nih.gov/pubmed/21624918>
- 666 37. Kirkeby C, Græsbøll K, Nielsen SS, Toft N, Halasa T. Epidemiological and economic



- 667 consequences of purchasing livestock infected with *Mycobacterium avium* subsp.  
668 paratuberculosis. *BMC Vet Res.* 2017;13(1):1–9.
- 669 38. Chi J, VanLeeuwen JA, Weersink A, Keefe GP. Direct production losses and treatment  
670 costs from bovine viral diarrhoea virus, bovine leukosis virus, *Mycobacterium avium*  
671 subspecies paratuberculosis, and *Neospora caninum*. *Prev Vet Med [Internet]*. 2002 Sep  
672 30 [cited 2018 Jun 18];55(2):137–53. Available from:  
673 <https://www.sciencedirect.com/science/article/pii/S0167587702000946?via%3Dihub>
- 674 39. Al-Mamun MA, Smith RL, Schukken YH, Gröhn YT. Modeling of *Mycobacterium avium*  
675 subsp. paratuberculosis dynamics in a dairy herd: An individual based approach. *J*  
676 *Theor Biol.* 2016;
- 677 40. Al-Mamun MA, Grohn YT. MABSDairy: A Multiscale Agent Based Simulation of a Dairy  
678 Herd. *Proc 50th Annu Simul Symp [Internet]*. 2017;8:1--8:12. Available from:  
679 <http://dl.acm.org/citation.cfm?id=3106388.3106396>
- 680 41. Robins J, Bogen S, Francis A, Westhoek A, Kanarek A, Lenhart S, et al. Agent-based  
681 model for Johne's disease dynamics in a dairy herd. *Vet Res [Internet]*. 2015;46:68.  
682 Available from: <http://dx.doi.org/10.1186/s13567-015-0195-y>
- 683 42. Kirkeby C, Græsbøll K, Halasa T. Evaluating the impact of transmission mode,  
684 calibration level and farmer compliance in simulation models of paratuberculosis in dairy  
685 herds. *Sci Rep [Internet]*. 2018 Dec 14 [cited 2018 Jun 18];8(1):9100. Available from:  
686 <http://www.nature.com/articles/s41598-018-27518-7>
- 687 43. Mitchell RM, Whitlock RH, Gröhn YT, Schukken YH. Back to the real world: Connecting  
688 models with data. *Prev Vet Med.* 2015;118(2–3):215–25.
- 689 44. WOOD PDP. Algebraic Model of the Lactation Curve in Cattle. *Nature [Internet]*. 1967  
690 Oct 14 [cited 2018 Jun 18];216(5111):164–5. Available from:  
691 <http://www.nature.com/doi/10.1038/216164a0>

- 692 45. Dematawewa CMB, Pearson RE, VanRaden PM. Modeling Extended Lactations of  
693 Holsteins. *J Dairy Sci* [Internet]. 2007 Aug 1 [cited 2018 Jun 18];90(8):3924–36. Available  
694 from:  
695 <https://www.sciencedirect.com/science/article/pii/S0022030207718490?via%3Dihub>
- 696 46. Pradhan a K, Van Kessel JS, Karns JS, Wolfgang DR, Hovingh E, Nelen K a, et al.  
697 Dynamics of endemic infectious diseases of animal and human importance on three  
698 dairy herds in the northeastern United States. *J Dairy Sci* [Internet]. 2009;92(4):1811–25.  
699 Available from: <http://dx.doi.org/10.3168/jds.2008-1486>
- 700 47. Pradhan AK, Mitchell RM, Kramer AJ, Zurakowski MJ, Fyock TL, Whitlock RH, et al.  
701 Molecular epidemiology of *Mycobacterium avium* subsp. *paratuberculosis* in a  
702 longitudinal study of three dairy herds. *J Clin Microbiol*. 2011;49(3):893–901.
- 703 48. Al-Mamun MA, Grohn YT. MABSDairy: A Multiscale Agent Based Simulation of a Dairy  
704 Herd. In: *Proceedings of the 50th Annual Simulation Symposium* [Internet]. San Diego,  
705 CA, USA: Society for Computer Simulation International; 2017. p. 8:1--8:12. (ANSS '17).  
706 Available from: <http://dl.acm.org/citation.cfm?id=3106388.3106396>
- 707 49. Lagarias JC, Reeds JA, Wright MH, Wright PE. Convergence Properties of the Nelder--  
708 Mead Simplex Method in Low Dimensions. *SIAM J Optim* [Internet]. 1998 Jan 31 [cited  
709 2018 Jun 18];9(1):112–47. Available from:  
710 <http://epubs.siam.org/doi/10.1137/S1052623496303470>
- 711 50. Smith, R L, Grohn, Y T, Pradhan, A K, Whitlock, R H, Van Kessel, J S, Smith, J M,  
712 Wolfgang, D R, Schukken YH. A longitudinal study on the impact of Johne's disease  
713 status on milk production in individual cows. *J Dairy Sci* [Internet]. 2009;92(6):2653–61.  
714 Available from: <http://www.sciencedirect.com/science/article/pii/S0022030209705818>
- 715 51. Verteramo Chiu LJ, Tauer LW, Al-Mamun MA, Kaniyamattam K, Smith RL, Grohn YT. An  
716 agent-based model evaluation of economic control strategies for paratuberculosis in a

- 717 dairy herd. J Dairy Sci [Internet]. 2018 Apr 26 [cited 2018 Jun 18]; Available from:  
718 <https://www.sciencedirect.com/science/article/pii/S0022030218303746>
- 719 52. Smith RL, Gröhn YT, Pradhan AK, Whitlock RH, Kessel JS Van, Smith JM, et al. The  
720 effects of progressing and nonprogressing Mycobacterium avium ssp . paratuberculosis  
721 infection on milk production in dairy cows. J Dairy Sci [Internet]. 2016;99:1383–90.  
722 Available from: <http://dx.doi.org/10.3168/jds.2015-9822>
- 723 53. Nielsen SS, Toft N. Ante mortem diagnosis of paratuberculosis: A review of accuracies  
724 of ELISA, interferon- $\gamma$  assay and faecal culture techniques. Vet Microbiol [Internet]. 2008  
725 Jun 22 [cited 2018 Jul 12];129(3–4):217–35. Available from:  
726 <https://www.sciencedirect.com/science/article/pii/S0378113507006451?via%3Dihub>
- 727 54. Nielsen SS, Toft N, Okura H. Dynamics of Specific Anti-Mycobacterium avium Subsp.  
728 paratuberculosis Antibody Response through Age. PLoS One. 2013;8(4).
- 729 55. Davidson RS, McKendrick IJ, Wood JC, Marion G, Greig A, Stevenson K, et al.  
730 Accounting for uncertainty in model-based prevalence estimation: paratuberculosis  
731 control in dairy herds. BMC Vet Res [Internet]. 2012;8:159. Available from:  
732 [http://www.pubmedcentral.nih.gov/articlerender.fcgi?artid=3544565&tool=pmcentrez&re](http://www.pubmedcentral.nih.gov/articlerender.fcgi?artid=3544565&tool=pmcentrez&rendertype=abstract)  
733 [ndertype=abstract](http://www.pubmedcentral.nih.gov/articlerender.fcgi?artid=3544565&tool=pmcentrez&rendertype=abstract)
- 734 56. Smith RL, Schukken YH, Pradhan AK, Smith JM, Whitlock RH, Van Kessel JS, et al.  
735 Environmental contamination with Mycobacterium avium subsp. paratuberculosis in  
736 endemically infected dairy herds. Prev Vet Med [Internet]. 2011;102(1):1–9. Available  
737 from: <http://dx.doi.org/10.1016/j.prevetmed.2011.06.009>
- 738 57. Kudahl AB, Østergaard S, Sørensen JT, Nielsen SS. A stochastic model simulating  
739 paratuberculosis in a dairy herd. Prev Vet Med [Internet]. 2007 Feb 16 [cited 2018 Jun  
740 18];78(2):97–117. Available from:  
741 <https://www.sciencedirect.com/science/article/pii/S0167587706002212>

- 742 58. Kirkeby C, Græsbøll K, Nielsen SS, Christiansen LE, Toft N, Rattenborg E, et al.  
743 Simulating the Epidemiological and Economic Impact of Paratuberculosis Control  
744 Actions in Dairy Cattle. *Front Vet Sci* [Internet]. 2016 Oct 10 [cited 2017 Feb 1];3:90.  
745 Available from: <http://journal.frontiersin.org/article/10.3389/fvets.2016.00090/full>
- 746 59. Smith RL, Schukken YH, Lu Z, Mitchell RM, Grohn YT. Development of a model to  
747 simulate infection dynamics of *Mycobacterium bovis* in cattle herds in the United States.  
748 *J Am Vet Med Assoc*. 2013;243:411–23.
- 749 60. Lu Z, Schukken YH, Smith RL, Mitchell RM, Gröhn YT. Impact of imperfect  
750 *Mycobacterium avium* subsp. *paratuberculosis* vaccines in dairy herds: A mathematical  
751 modeling approach. *Prev Vet Med* [Internet]. 2013;108(2–3):148–58. Available from:  
752 <http://dx.doi.org/10.1016/j.prevetmed.2012.08.001>
- 753 61. Lu Z, Schukken YH, Smith RL, Gröhn YT. Using vaccination to prevent the invasion of  
754 *Mycobacterium avium* subsp. *paratuberculosis* in dairy herds: A stochastic simulation  
755 study. *Prev Vet Med* [Internet]. 2013;110(3–4):335–45. Available from:  
756 <http://dx.doi.org/10.1016/j.prevetmed.2013.01.006>
- 757 62. Crispell J, Zadoks RN, Harris SR, Paterson B, Collins DM, de-Lisle GW, et al. Using  
758 whole genome sequencing to investigate transmission in a multi-host system: bovine  
759 tuberculosis in New Zealand. *BMC Genomics* [Internet]. 2017 [cited 2018 Jul  
760 20];18(1):180. Available from: <http://www.ncbi.nlm.nih.gov/pubmed/28209138>
- 761 63. Zimpel CK, Brandão PE, de Souza Filho AF, de Souza RF, Ikuta CY, Ferreira Neto JS, et  
762 al. Complete Genome Sequencing of *Mycobacterium bovis* SP38 and Comparative  
763 Genomics of *Mycobacterium bovis* and *M. tuberculosis* Strains. *Front Microbiol*  
764 [Internet]. 2017 Dec 5 [cited 2018 Jul 20];8:2389. Available from:  
765 <http://journal.frontiersin.org/article/10.3389/fmicb.2017.02389/full>  
766

767

768

769 Table S1. The best 1% parameter sets were ranked from the parameter searching space.

| Parameters                                                       | Herd A                                                                 | Herd B                                                                 | Herd C                                                                |
|------------------------------------------------------------------|------------------------------------------------------------------------|------------------------------------------------------------------------|-----------------------------------------------------------------------|
|                                                                  | Mean (95% CI)                                                          | Mean (95% CI)                                                          | Mean (95% CI)                                                         |
| Adult to adult transmission coefficient ( $\beta_A$ )            | <b>0.0033 (0.00062-0.0069)</b>                                         | <b>0.0046 (0.0017-0.0075)</b>                                          | <b>0.0041 (0.00047-0.0065)</b>                                        |
| Adult to calf transmission coefficient ( $\beta_a$ )             | 0.54 (0.11-0.96)                                                       | 0.37 (0.064-0.079)                                                     | 0.63 (0.055-0.9)                                                      |
| Environmental transmission coefficient ( $\beta_{environment}$ ) | <b>0.053 (0.0089-0.090)</b>                                            | <b>0.05 (0.0056-0.078)</b>                                             | <b>0.046 (0.0036-0.087)</b>                                           |
| Calf to calf transmission coefficient ( $\beta_c$ )              | $0.69 \times 10^{-6}$ ( $0.4 \times 10^{-6}$ - $1.2 \times 10^{-5}$ )  | $6.5 \times 10^{-6}$ ( $0.69 \times 10^{-6}$ - $1.2 \times 10^{-5}$ )  | $8.4 \times 10^{-6}$ ( $0.18 \times 10^{-6}$ - $1.2 \times 10^{-6}$ ) |
| Heifer to heifer transmission coefficient ( $\beta_h$ )          | $0.54 \times 10^{-6}$ ( $0.53 \times 10^{-6}$ - $0.1 \times 10^{-4}$ ) | $4.9 \times 10^{-6}$ ( $0.29 \times 10^{-6}$ - $0.11 \times 10^{-5}$ ) | $3.9 \times 10^{-6}$ ( $0.35 \times 10^{-6}$ - $0.1 \times 10^{-4}$ ) |
| Initial latent                                                   | 30 (3-75)                                                              | 10 (5-19)                                                              | 73 (52-85)                                                            |
| Initial low shedding animals                                     | 18 (4-35)                                                              | 12 (2-36)                                                              | 31 (4-49)                                                             |
| Initial high shedding animals                                    | 16 (7-23)                                                              | 11 (2-22)                                                              | 13 (2-23)                                                             |

770

771 FigS1. The model predicted fitted to the observed milk yield for 360 days in milk for Farm A, B

772 and C. The milk yield was calculated using equation shown in the method section.

773 FigS2. The model predicted median number of years to reduce the apparent prevalence by 25%

774 (top panel) and 5% (bottom panel) calculated from top 1% simulations with best set of  
775 parameters while implementing two control scheme I: aggressive culling and control II: delayed  
776 culling after the pre-intervention fit for the farms A, B and C.

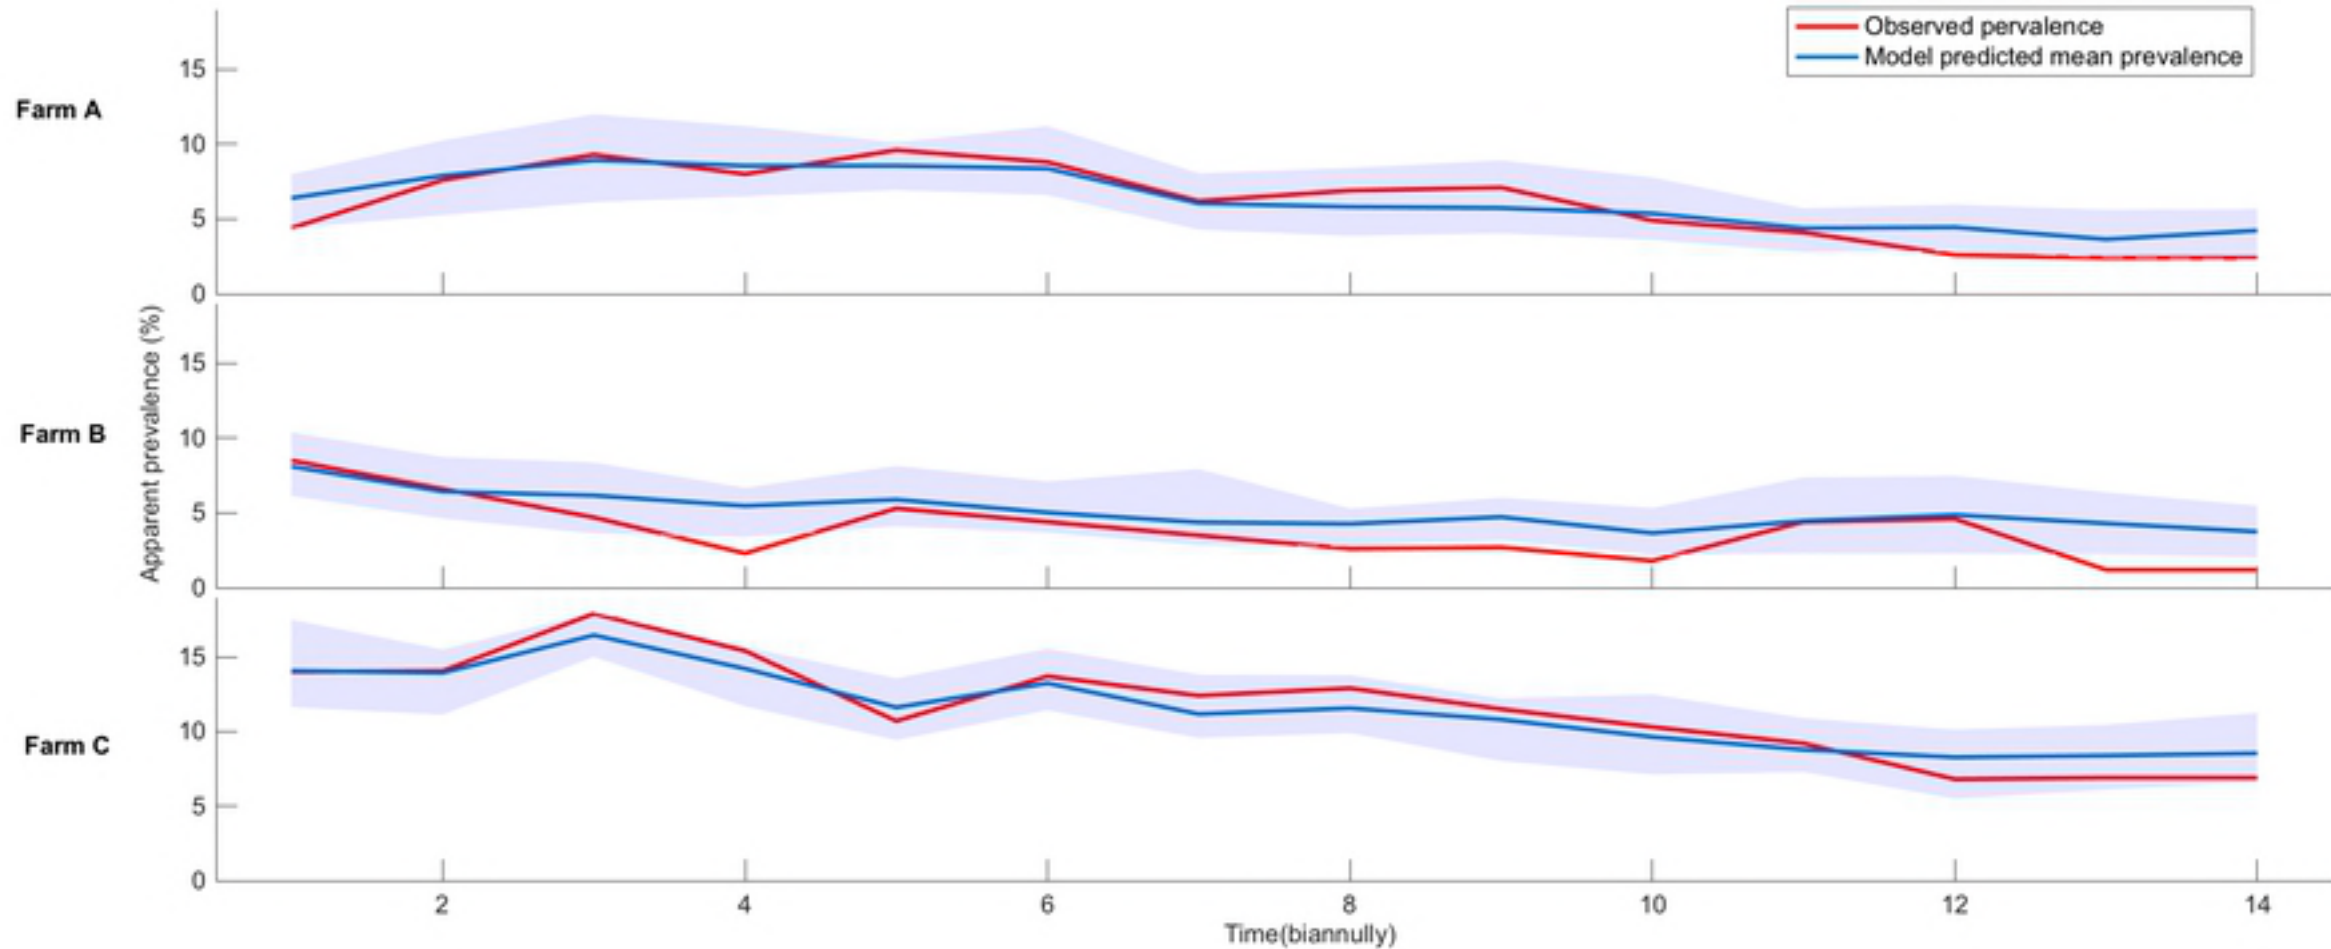

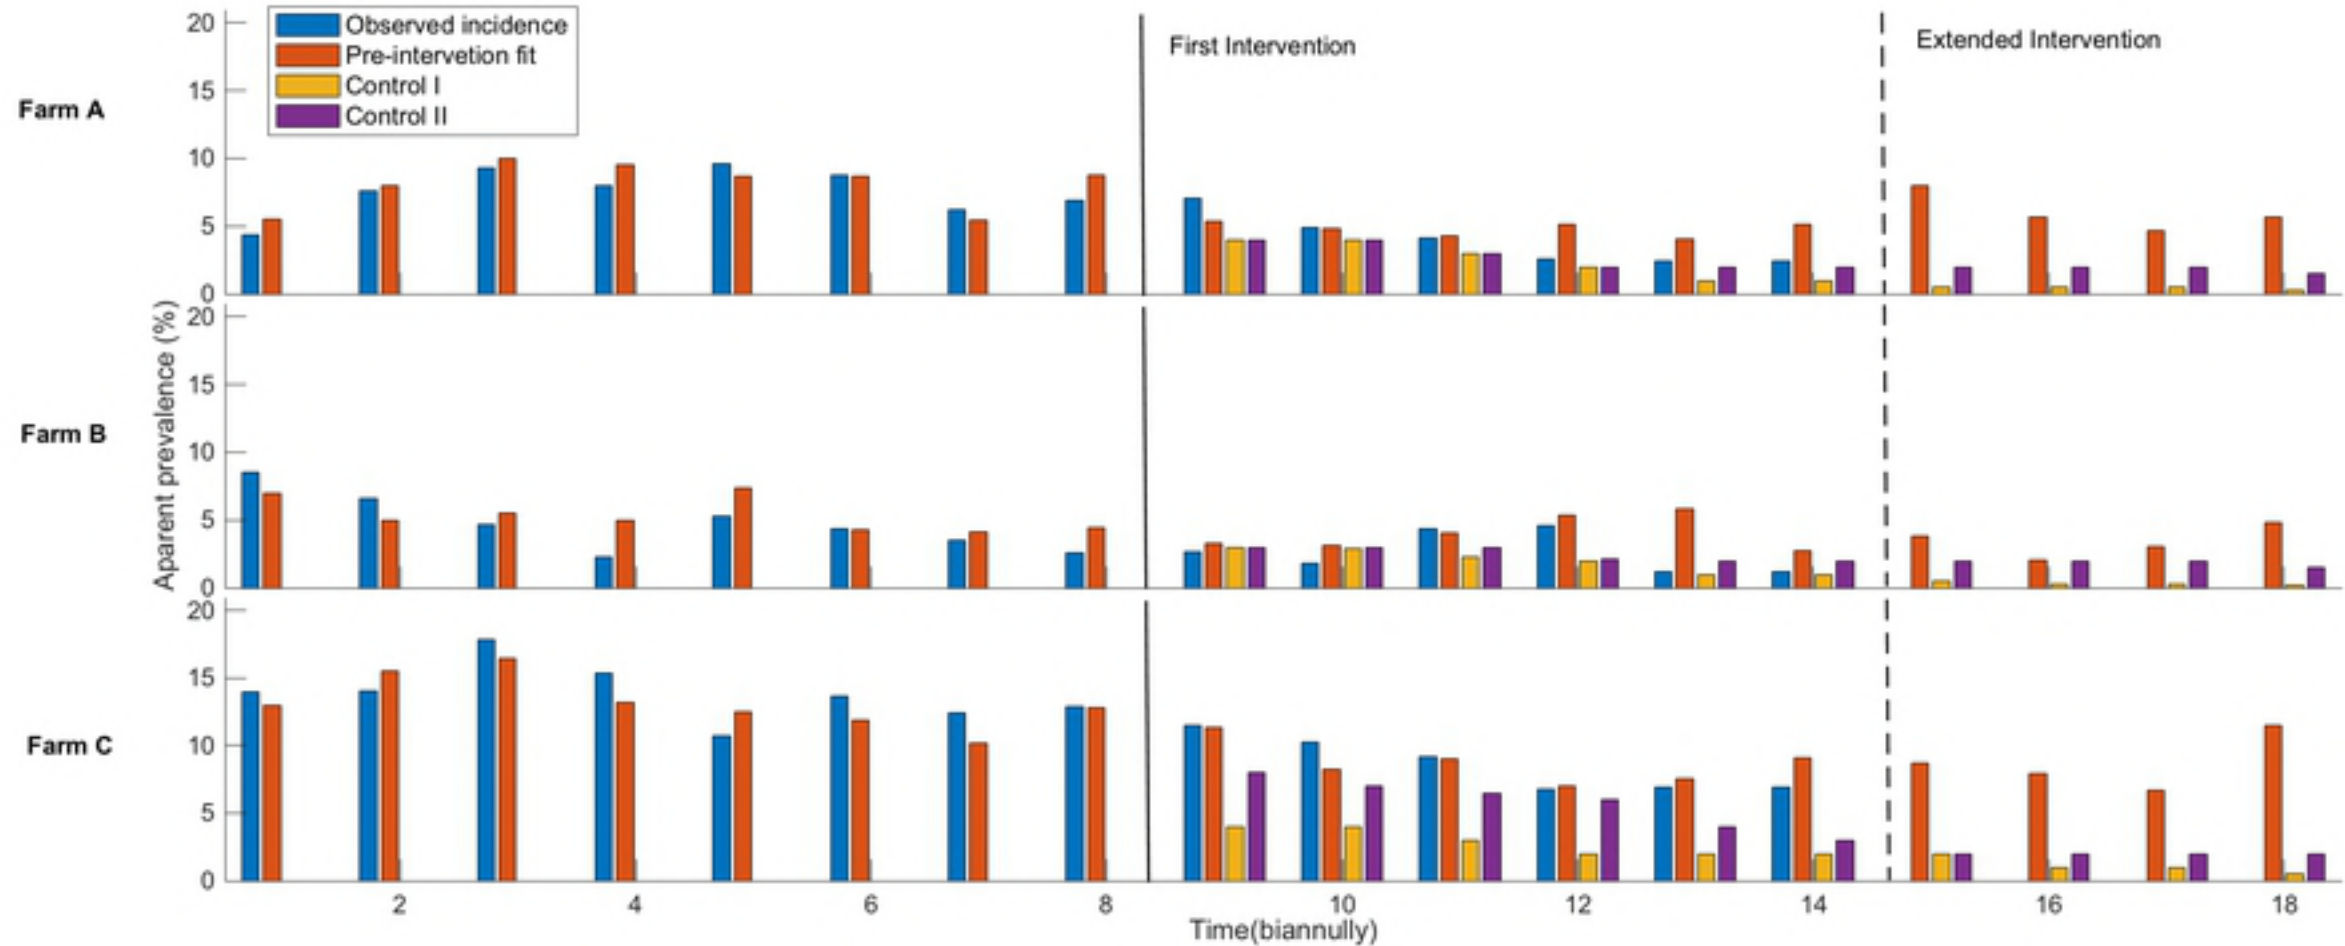



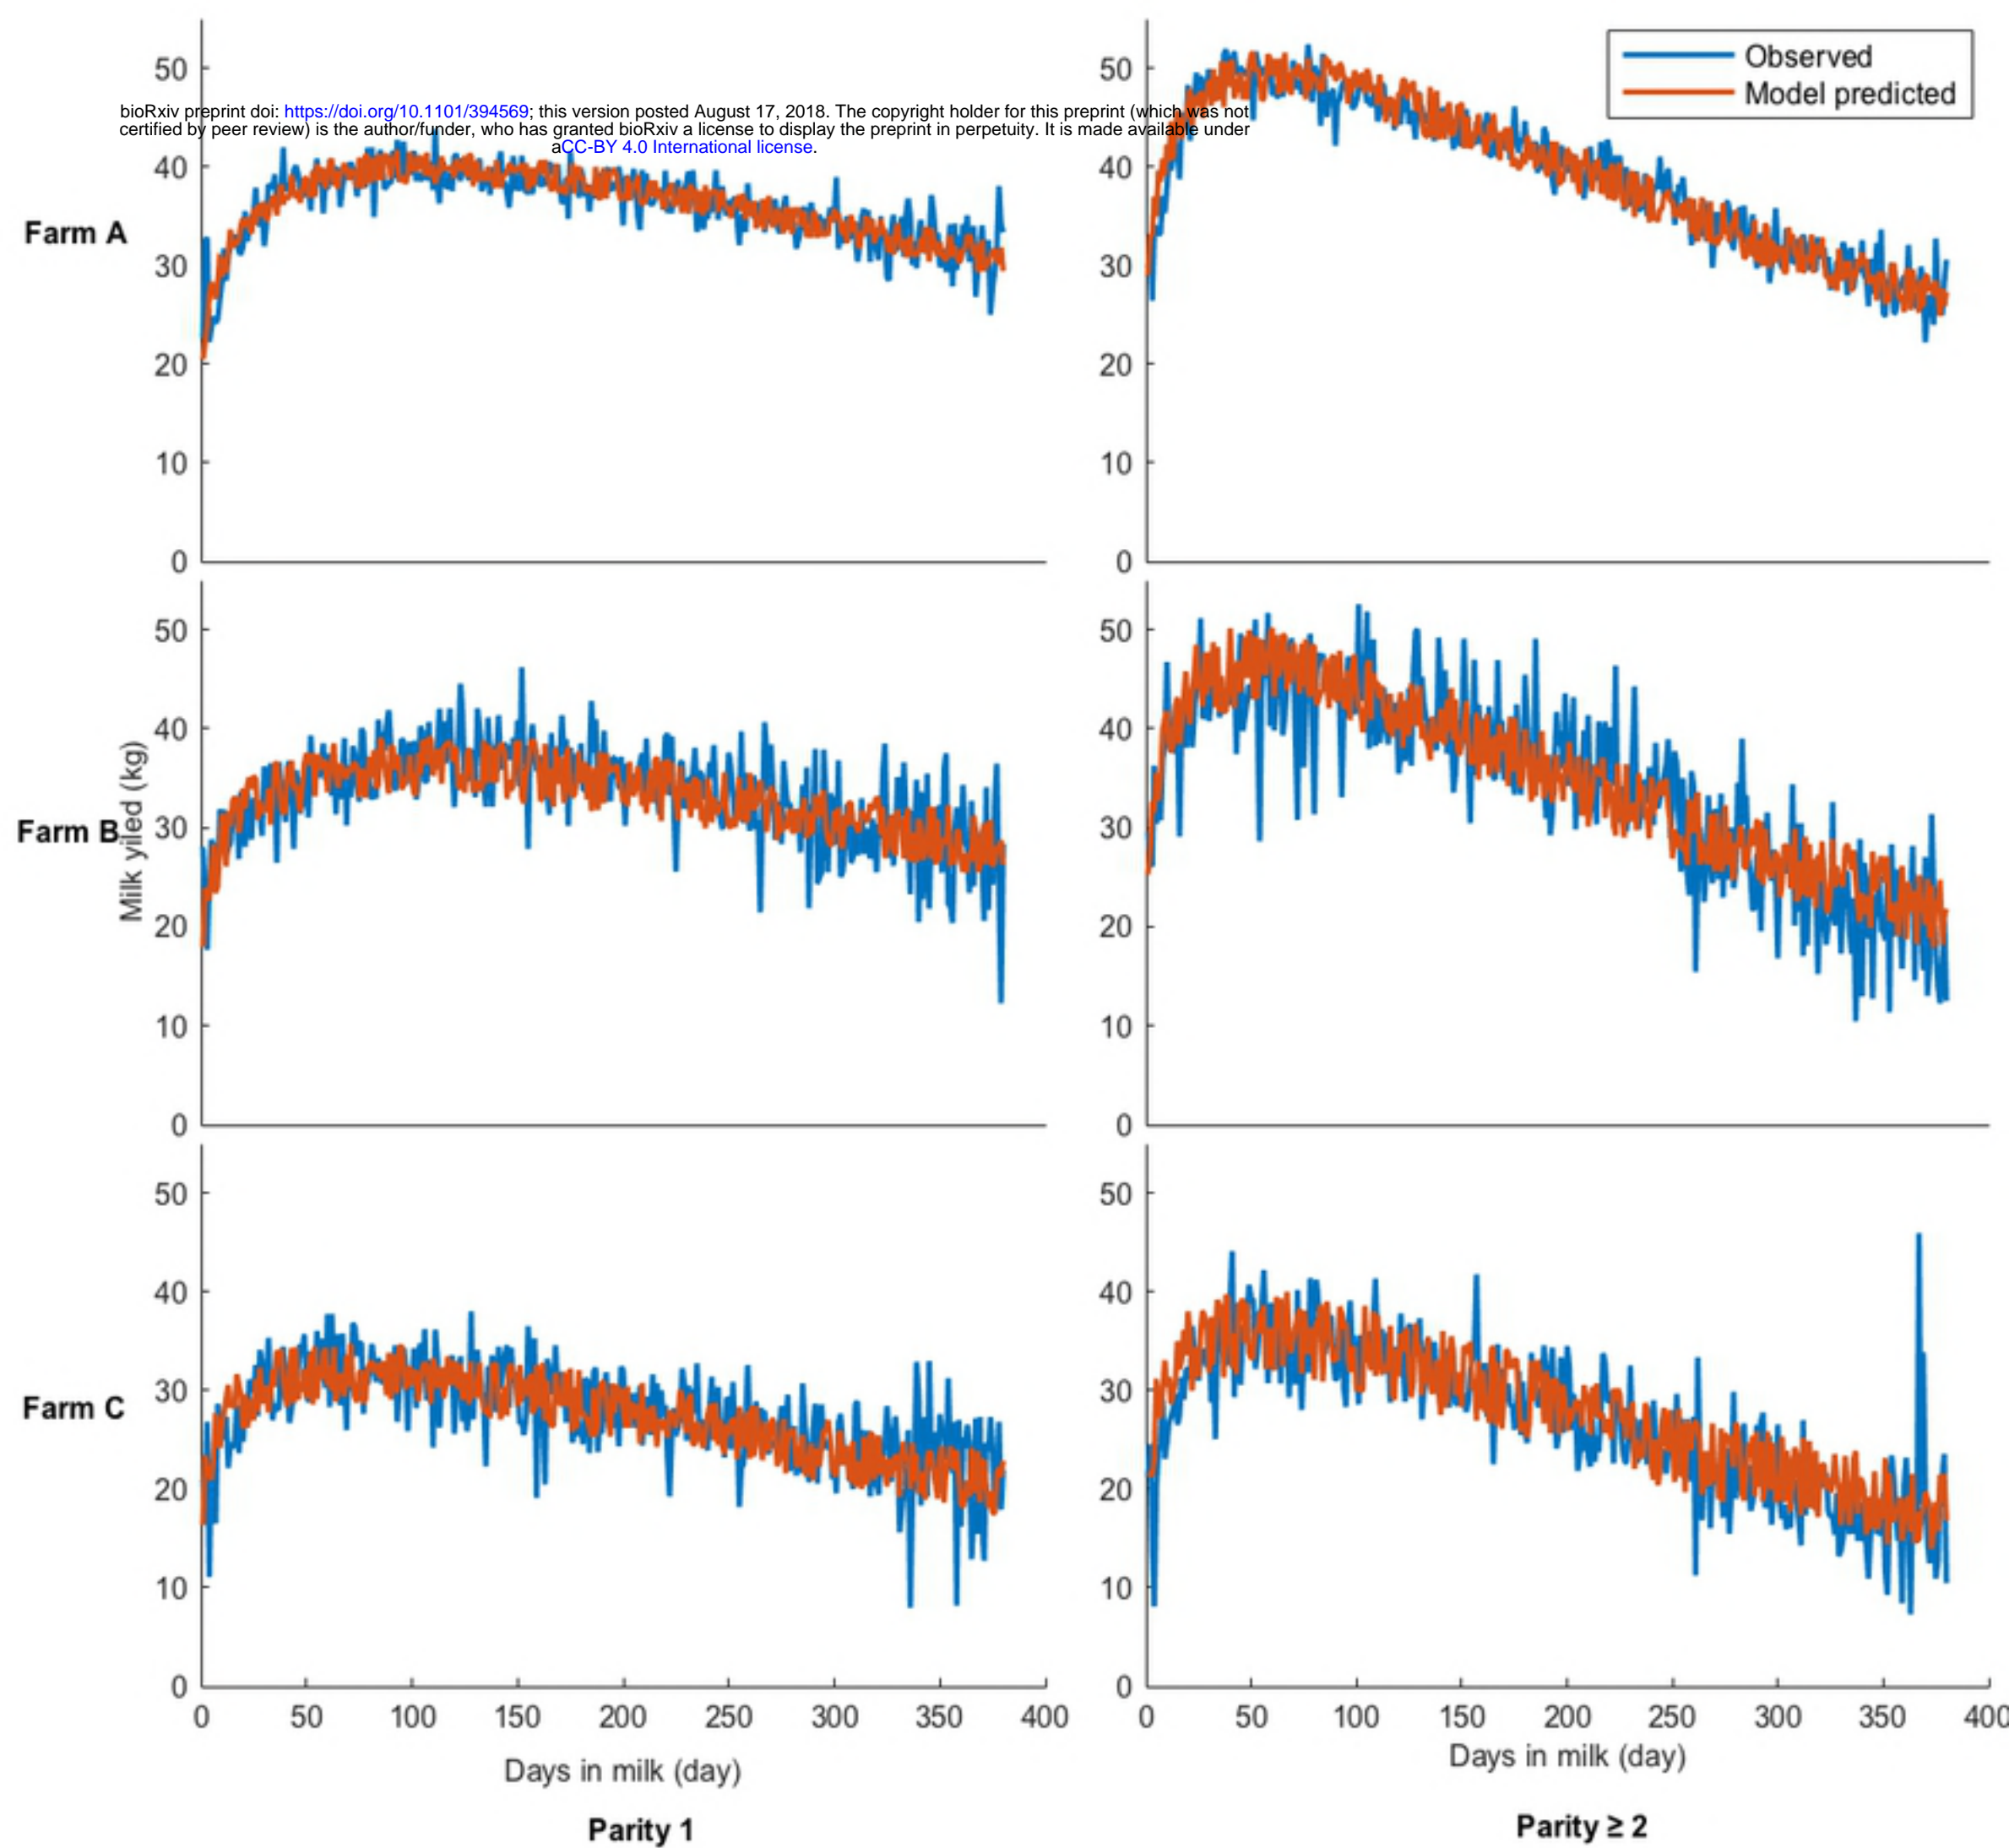

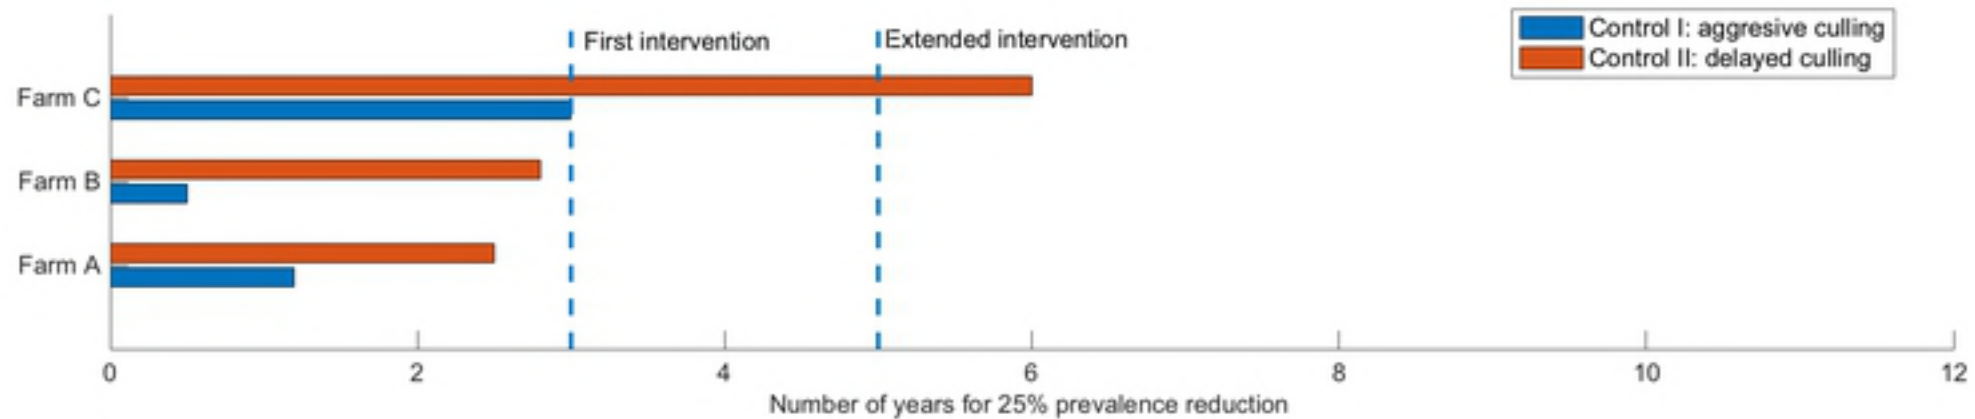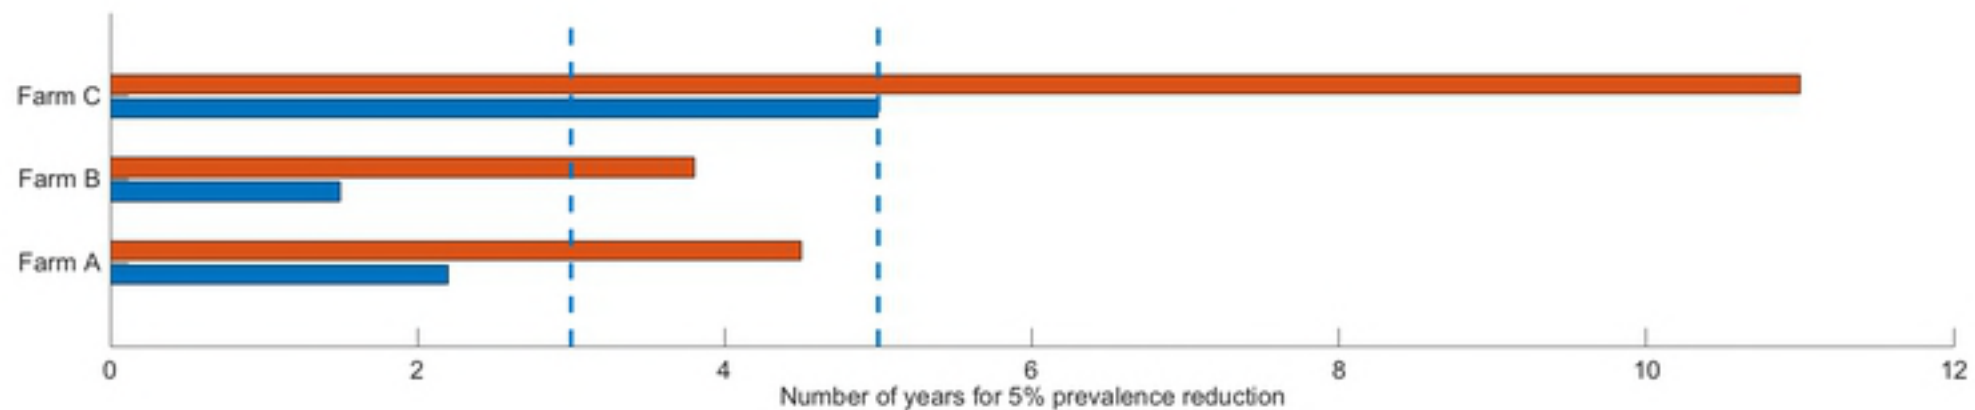

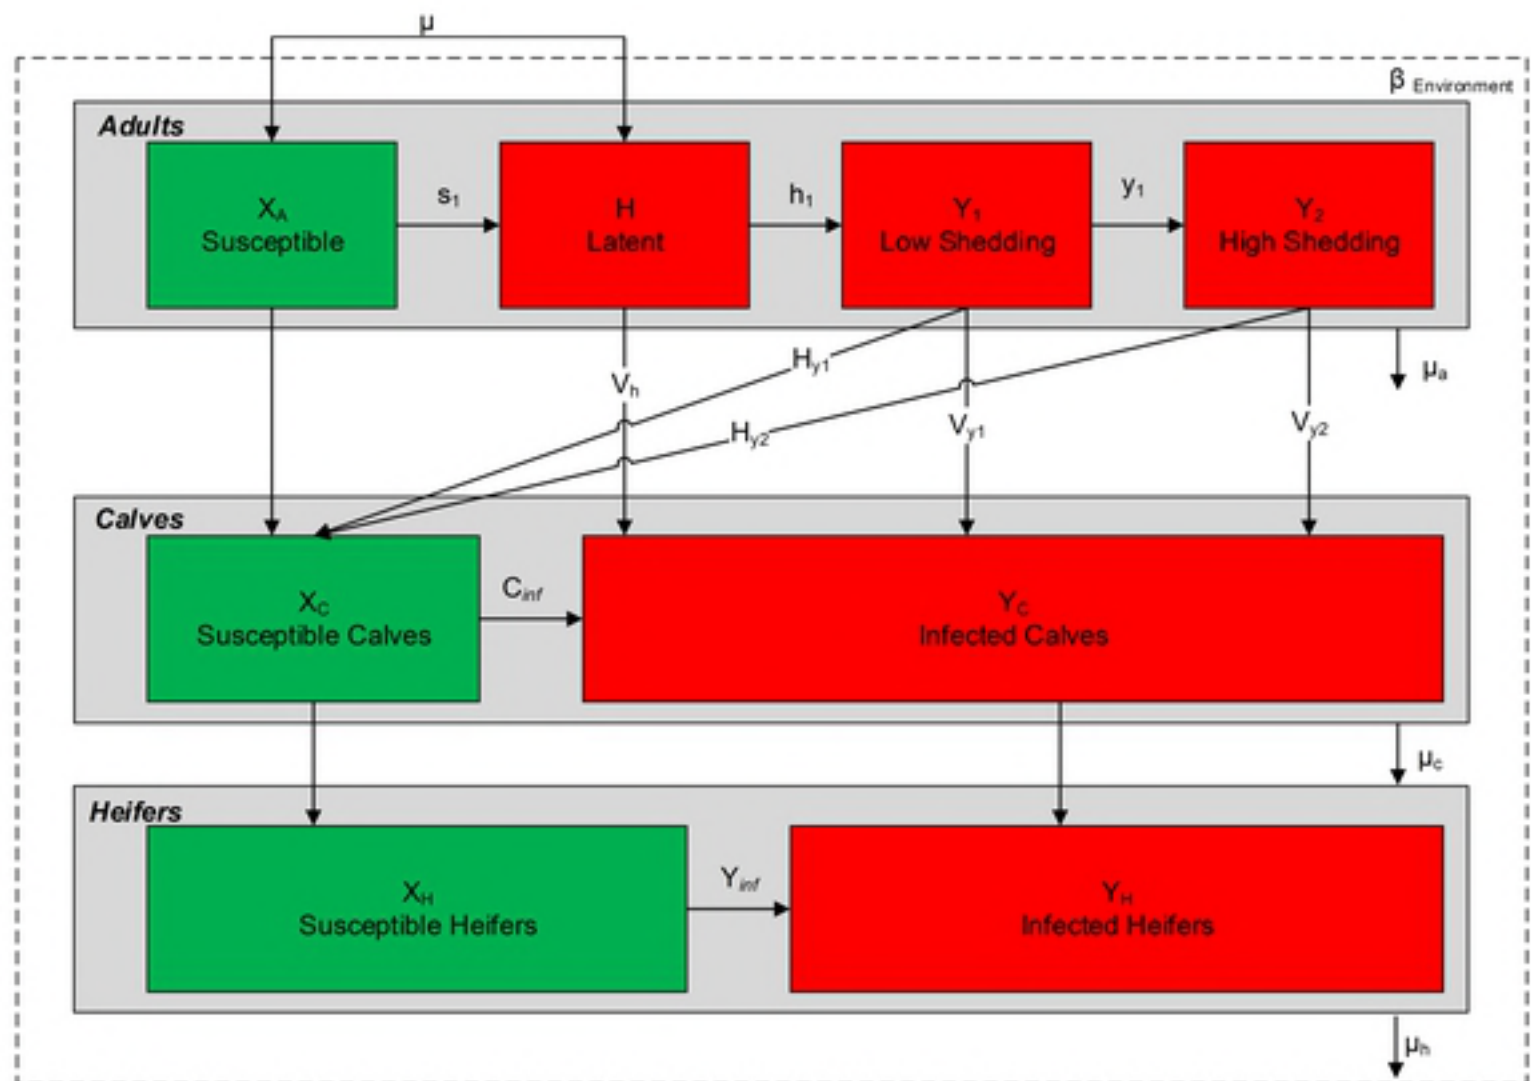

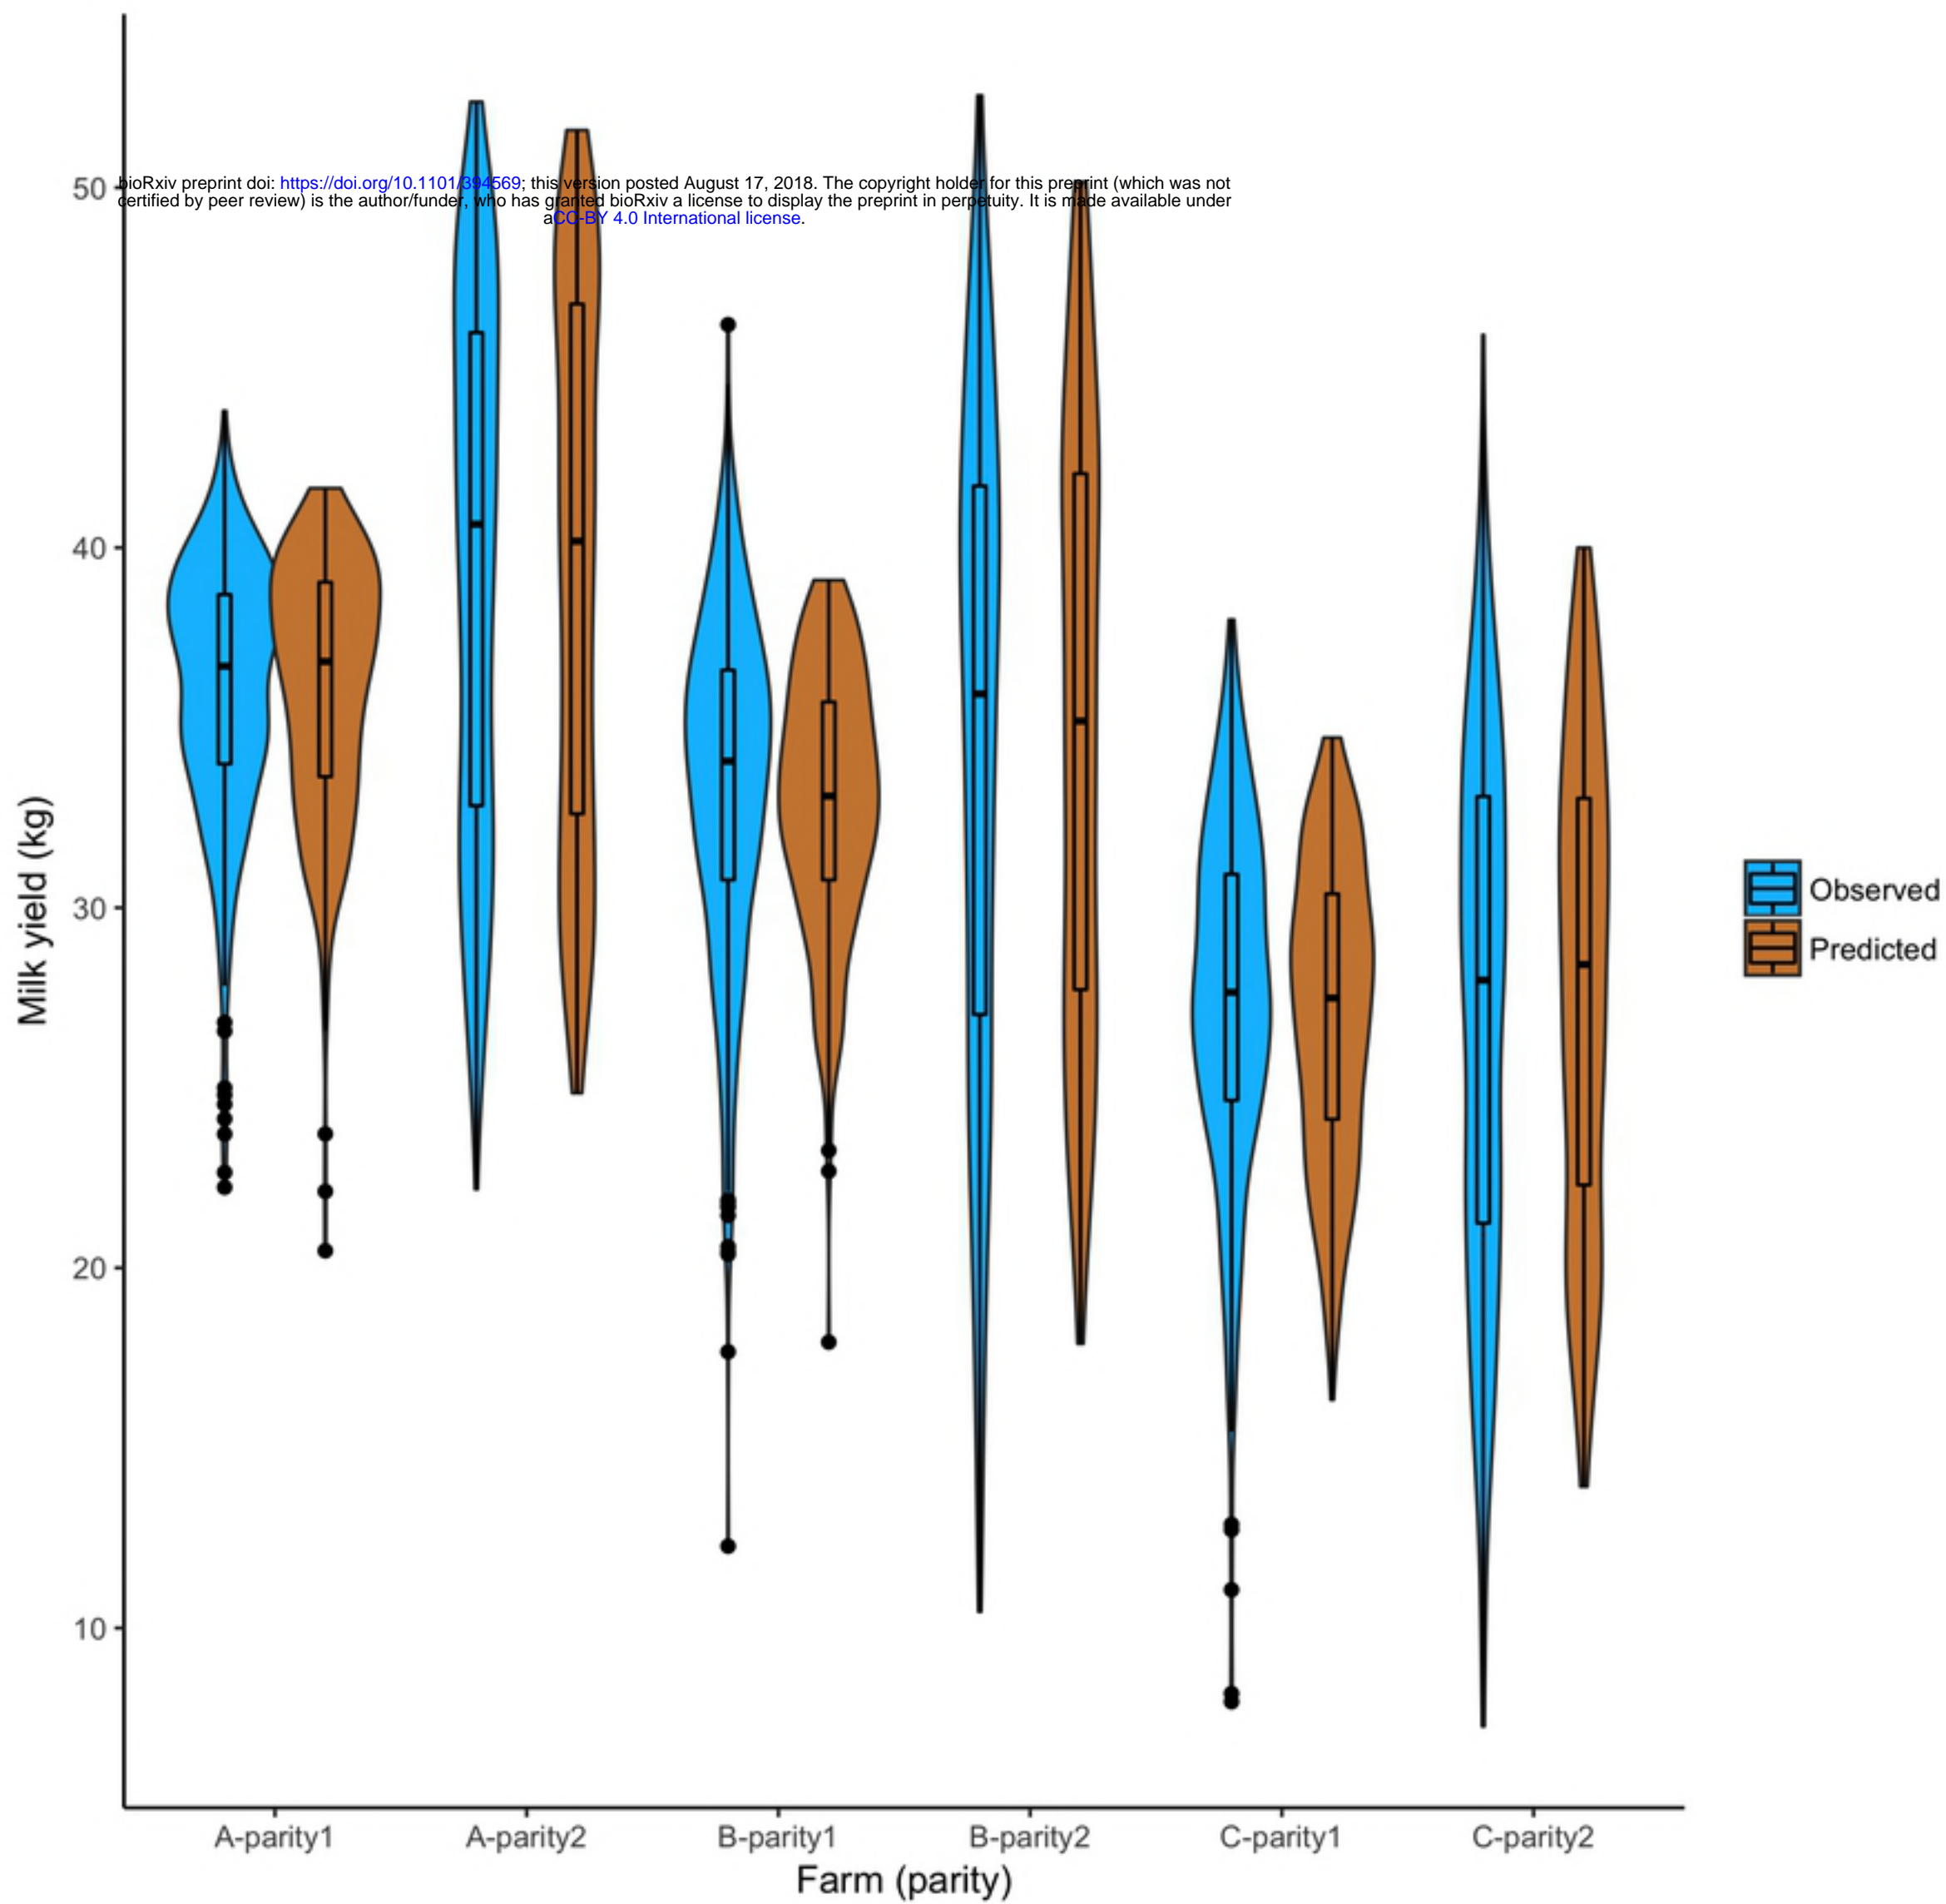

Source: https://www.biorxiv.org/content/10.1101/394569v1.full.pdf
